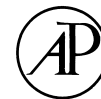

## The Bryophyta (Mosses): Systematic and Evolutionary Inferences from an *rps4* Gene (cpDNA) Phylogeny

BERNARD GOFFINET\*§, CYMON J. COX†||, A. JONATHAN SHAW§ and  
TERRY A. J. HEDDERSON‡||

§Department of Botany, Duke University, Box 90339, Durham NC, 27708-0339, USA and ||Department of Botany, School of Plant Sciences, The University of Reading, Whiteknights, Reading RG6 6AS, UK

Received: 31 May 2000 Returned for revision: 12 September 2000 Accepted: 3 October 2000

Phylogenetic analyses of nucleotide and amino acid sequences of the chloroplast protein coding gene *rps4* were performed for 225 species of mosses, representing 84 % of families recognized by Vitt (1984. In: Schuster RM, ed. *New manual of bryology*, vol 2. Nichinan: Hattori Botanical Laboratory), under the criterion of maximum parsimony with *Takakia* and *Sphagnum* as outgroups. Most parsimonious topologies converge to a scenario wherein the Andreaeidae are monophyletic and sister to the Bryidae (peristomate mosses), the Nematodontae and the Buxbaumiaceae form a monophyletic lineage, the Diphysciaceae are sister to the Arthrodoneteae and, within the latter, the Funariineae-Encalyptineae-Timmiaaceae-Haplolepideae compose a monophyletic clade sister to remaining diplolepideous mosses. This hypothesis suggests that early in the evolution of the Arthrodoneteae, two major lineages diverged, with opposite and alternate peristomes, respectively. Bootstrap support for the deep dichotomies is poor or lacking but increases when protein translations of *rps4* sequences are included in the analysis. Several novel systematic hypotheses are raised, including (a) a diplolepideous rather than haplolepideous origin of the Pleurophascaceae; (b) an affinity of the Catascopeaceae with the Funariineae rather than the Bryineae; and (c) a close relationship of the Calomniaceae and Mitteniaceae to the Rhizogoniaceae. The advantages and disadvantages of a single gene phylogeny are discussed with respect to the identification of polyphyletic familial or suprafamilial taxa. © 2001 Annals of Botany Company

**Key words:** Bryophyta, mosses, phylogeny, *rps4*, evolution, peristome, parsimony, sequences.

### INTRODUCTION

With an estimated 13 000 species (Crosby *et al.*, 1999), the Bryophyta (i.e. mosses *sensu* Buck and Goffinet, 2000) compose a lineage of land plants whose diversity is second only to that of the angiosperms. Mosses, like liverworts and hornworts, are characterized by a life cycle that is dominated by the gametophytic or haploid phase. The sporophyte remains attached to the gametophyte during its short existence, which rarely exceeds 1 year. A single sporangium is produced at the apex of an unbranched axis, the seta. Spores are dispersed either through one or more vertical slits or, as is the case for most mosses, after dehiscence of a lid, called the operculum. In operculate mosses, the mouth of the capsule is lined by one or two rows of teeth, which compose the peristome. To a large extent, the mode of dehiscence and morphological features of the peristome provide the basis for the higher level classification of mosses (e.g. Vitt, 1984). However, these characters fail to offer substantial information to address the relationships among these lineages (Vitt *et al.*, 1998). Although developmental studies of the

peristome have yielded characters distinctive of lineages (Shaw *et al.*, 1987, 1989a, b; Shaw and Anderson, 1988), the polarity of transformations between character states (in particular for the most crucial character, namely the pattern of cell division in the innermost layer contributing to the peristome) remains ambiguous in the absence of a robust phylogenetic hypothesis (Vitt *et al.*, 1998; Goffinet *et al.*, 1999). Many morphological characters of the gametophyte appear autapomorphic, extensively homoplastic or plagued by reversals (see Vitt, 1984) to the extent that they had, until recently (see Newton *et al.*, 2000), been abandoned for formally addressing the higher level relationships among mosses.

The only attempt to formulate a phylogenetic hypothesis for mosses using morphological data was made by Mishler and Churchill (1984). Until recently their hypothesis has remained the only explicit phylogeny proposed for major lineages of mosses. According to their scenario, the Nematodontae, that is, mosses whose peristome is constitute of whole cells *vs.* cell wall remnants (i.e. in the Arthrodoneteae), constitute a basal grade, with the Buxbaumiaceae sister to the Arthrodoneteae. Vitt (1984) considered the peristome of the Buxbaumiaceae to integrate nematodontous and arthrodonous elements, and suggested a rather basal position of this peristome type in the evolutionary history of the arthrodonous peristome.

DNA sequence data have become increasingly integrated in bryophyte systematics in the last 5 years. Most studies have focused either on the monophyly of bryophytes and

\* For correspondence at: Department of Ecology and Evolutionary Biology, 75 North Eagleville Road, U-3043, University of Connecticut, Storrs CT, 06269-3043, USA. Fax +1 860 486 6364, e-mail [goffinet@uconn.edu](mailto:goffinet@uconn.edu)

† Current address: Department of Botany, Box 90339, Duke University, Durham NC, 27708-0339, USA.

‡ Current address: Department of Botany, University of Cape Town, Private Bag, Rondebosch 7701, South Africa.

their position in the evolution of land plants (e.g. Waters *et al.*, 1992; Hedderson *et al.*, 1996) or examined the relationships within major lineages (e.g. Capesius and Stech, 1997; Goffinet *et al.*, 1998; Cox and Hedderson, 1999; De Luna *et al.*, 1999, 2000; Buck *et al.*, 2000; Cox *et al.*, 2000; Goffinet and Cox, 2000; La Farge *et al.*, 2000; Shaw, 2000). Thus far, only two studies have specifically addressed the relationships among major lineages of mosses, using exemplars of most major lineages. Newton *et al.* (2000) inferred phylogenetic relationships from analysing sequences of nuclear (*18SrRNA*) and chloroplast loci (*rbcL*, *rps4*, and *trnL-trnF*), whereas Beckert *et al.* (1999) tested phylogenetic hypotheses using the mitochondrial gene *nad5*. Differences in the phylogenetic conclusions reached by these authors pertain primarily to the early diversification of arthrodontous mosses. Newton *et al.* (2000) suggested that (1) *Diphyscium* was not related to *Buxbaumia*, but instead was sister to all Arthrodontae; (2) that within the latter the Funariaceae represented the earliest derivation, immediately followed by the Timmiaceae; and (3) that the Haplolepidaceae together with the Encalyptaceae composed a sister group to the remaining diplolepidaceous mosses. The latter two conclusions were also reached by Goffinet *et al.* (1998), based on *rbcL* sequences, and by Cox and Hedderson (1999) using chloroplast (*trnL-trnF* and *rps4*) and nuclear (*18SrRNA*) data. In contrast, Beckert *et al.* (1999) proposed that the Haplolepidaceae share a common ancestor with the Funariaceae and the Timmiaceae, an hypothesis congruent with inferences from chloroplast data (Goffinet and Cox, 2000).

Phylogenetic inconsistencies among these studies may reflect past hybridization events, or represent artifacts due to constraints on the molecular evolution of the loci which affect patterns of homoplasy. The effect of the latter may be dependent on the taxon sampling and outgroup selection. Goffinet and Cox (2000) pointed out that lineages of reduced taxa, such as the Gigaspermaceae or Disceiaceae, which are routinely ignored in phylogenetic studies because they lack the morphological characters that would allow inferences about the evolution of these traits, may hold critical positions in the early evolutionary history of the arthrodontous clade or some of its major lineages. Inclusion of these taxa may therefore be essential for reconstructing basal divergences. Finally, the inference of polarization of character transformations within the mosses is dependent on the nature of the outgroup chosen. Hedderson *et al.* (1996) provided molecular evidence that *Takakia* belongs to the Bryophyta (i.e. mosses), an hypothesis supported by the subsequent discovery of the sporophyte generation (Smith and Davison, 1993; Renzaglia *et al.*, 1997). The studies by Capesius and Stech (1997) and Beckert *et al.* (1999) did not include *Takakia*, and inferred relationships within mosses using liverwort taxa as outgroups. Evidence from 18S rDNA (Cox, 1998; Hedderson *et al.*, 1998) suggest that *Takakia* and *Sphagnum* form the sister group to the arthrodonts, whereas combined 18S rDNA and chloroplast data (Newton *et al.*, 2000) suggests that *Takakia* and the Sphagnideae compose the sister group to all other mosses.

The present study was therefore designed to sample extensively across the major lineages of mosses, while

focusing on a single chloroplast locus (small ribosomal protein 4 or *rps4*) in an attempt to reconstruct the phylogeny of mosses using *Takakia* and *Sphagnum* as outgroups. This study specifically aims to address the following questions: (1) does peristome architecture as defined by Vitt (1984) define monophyletic groups; and (2) do the suprageneric systematic concepts adopted by Vitt (1984) concur with phylogenetic hypotheses inferred from a single chloroplast gene?

## MATERIALS AND METHODS

### *Taxon sampling*

Vitt (1984) accommodated mosses into 92 families. Exemplars for families for which *rps4* sequences were not currently available from GenBank were sampled from the following herbaria: BUF, DUKE, H, MO, and NY. Sixty-seven new taxa were targeted for this study.

### *DNA extraction and PCR*

Exemplars of most families of mosses were sampled from dry herbarium material or recently collected material. Sequences were generated in two laboratories, Duke University, NC, USA and the University of Reading, UK. Detailed extraction protocols, complete PCR amplification and sequencing protocols followed by these laboratories can be found in Buck *et al.* (2000), and Cox and Hedderson (1999), respectively. Translation of nucleotide sequences into amino acid sequences was done using MacClade (Maddison and Maddison, 1999).

### *Sequence analysis*

Amplified fragments comprised the *rps4* gene and the 3' intergenic spacer. Phylogenetic relationships were inferred under the criterion of maximum parsimony using the coding sequences only. The sequences were trimmed at the 5' end to exclude the primer annealing region. The Takakiaceae together with the Sphagnideae were used as outgroups, albeit without constraining their monophyly. The following search strategy was applied using PAUP\* 4.0b3a (Swofford, 2000): heuristic searches were replicated 200 times, allowing for ten trees to be saved for each replicate, using the nearest-neighbour interchange (NNI) swapping option, and invoking the 'steepest descent' and the 'collapse branches when maximum length is equal to zero' options. All the resulting trees were swapped extensively using the TBR swapping option with the 'steepest descent' option turned off, and with a maximum limit of 20 000 trees to be retained. Strict and 90% majority-rule consensus trees were generated for each analysis. Four data sets were analysed using this approach: complete nucleotide sequences, codon positions one and two only, and each of these two sets in combination with the amino acid translation of the sequences. The fast bootstrap procedure (i.e. a bootstrap without branch swapping) was preferred over a regular bootstrap analysis due to the computational (i.e. time) requirement for the latter to reach completion. The fast bootstrap analysis was conducted with 5000 replicates and the consensus of the

resulting trees used to assess the robustness of the branches. The presence of hierarchical structure in the four data sets was assessed by examination of the  $g_1$  statistic inferred from the length distribution of 50 000 random trees (see Hillis and Huelsenbeck, 1992). The statistical significance of tree length differences between alternative topologies was assessed using the Templeton test (Templeton, 1983) as implemented in PAUP\*. Phylograms were inferred under the assumptions of accelerated transformation between character-states (ACCTRAN option).

## RESULTS

### Sequence characterization and variability

Sequences were obtained for 67 taxa, and submitted to GenBank (Table 1). In addition to the sequences available from GenBank, we compiled a matrix of 225 taxa. These exemplars correspond to 190 genera distributed among 86 families of mosses, representing 84% of the families accepted by Vitt (1984) in his classification of mosses.

In all cases, amplifications yielded a single strong band that was accompanied by lighter accessory bands in some samples (Fig. 1). The latter did not, however, alter the high quality of the sequence obtained. Only a single taxon, namely *Ambuchanania leucobryoides* (Yamaguchi, Seppelt & Iwatsuki) Seppelt & Crum, yielded an amplification product whose sequence was considered unreliable and of low quality, and was thus not included. The sequence for *Pleurophascum occidentale* is partial but was retained for the analysis. The length of the product varied by about 200 bp between *Takakia*, the Sphagnales, Andreaeales, Andreaebryales, Tetrarhizales, *Oedipodium*, and the Polytrichales, vs. the Arthrodonontae, the latter yielding shorter fragments (Fig. 1). All arthrodonontous mosses including the Buxbaumiaceae and the Diphysciaceae were characterized by a shorter fragment ( $\pm 680$  bp vs. 880 bp). The length differences were accounted for by a decrease in the size of the 3' intergenic spacer in the Arthrodonontae. The coding sequences were easily aligned as indels were restricted to the loss of a codon (number 37) in the Funariaceae (Goffinet and Cox, 2000), and the loss of two codons (35 and 36) in *Theriotia lorifolia*, a member of the Diphysciaceae. Additional stop codons in the coding region were not detected suggesting the absence of pseudogenes within the data set. The variability and the distribution of parsimony informative characters among data partitions is presented in Table 2.

### Tree statistics of the most-parsimonious trees

The limit of Most Parsimonious Trees (MPTs) to be saved was reached for each analysis. Two distinct islands were uncovered for the *rps4* + amino acid data set, and 15 000 trees were retained for each. Descriptions of the MPTs obtained for all four analyses are summarized in Table 3. Ninety percent majority-rule trees of all MPTs were constructed for each analysis and these are summarized in Figs 2 and 3. Only lineages at the family level or above that are relevant to the overall phylogeny of mosses

are shown, except for novel phylogenetic hypotheses regarding specific genera or families. A phylogram of the first MPT (island 1) inferred from the full nucleotide data complemented by its protein translation is presented in Figs 4–6. Strict consensus trees were better resolved toward the base of the tree when these were inferred from nucleotide and amino acid data (Fig. 2B vs. A and Fig. 3B vs. A). The exclusion of 'hypervariable characters' (i.e. the third codon positions) resulted in a decrease in resolution in the summary trees (Figs 2A vs. 3A) except when protein sequences complemented the 1<sup>st</sup> and 2<sup>nd</sup> codon positions (Figs 2B vs. 3B), in which case, the consensus tree was better resolved but held at least one very unlikely relationship (see below). Trees generated by fast bootstrapping showed little consensus for most relationships, with most branches defining the ordinal relationships (*sensu* Vitt, 1984) being present in 73% or less of these trees. However, bootstrap values increased slightly when amino acid sequences were incorporated into the analyses (Fig. 2B vs. A and Fig. 3B vs. A). The exclusion of the 3<sup>rd</sup> codon positions did not result in higher bootstrap values (Figs 3A vs. 2A and Figs 3B vs. 2B). Consistency indices (CI, based on informative characters only) improved upon inclusion of the amino acid data or upon the exclusion of the 3<sup>rd</sup> codon positions. The highest average CI was obtained for trees derived from analysing the variation contained in the 1<sup>st</sup> and 2<sup>nd</sup> codon positions in the presence of protein data (Table 3). Complementing the full *rps4* sequences with their translation product resulted in an increase of the average CI for characters of the 1<sup>st</sup> and 2<sup>nd</sup> codon positions (from 0.2504 to 0.2515 and from 0.2448 to 0.2560, respectively) and a decrease in average CI from 0.2276 to 0.2216 for those of the 3<sup>rd</sup> codon positions. Furthermore, optimization of amino acid character transformations on the tree inferred on *rps4* nucleotide sequences alone revealed a decrease in average CI compared to trees generated from *rps4* + protein data (i.e. a change from 0.2877 to 0.2753). The length of a tree obtained from analysing the 1<sup>st</sup> and 2<sup>nd</sup> codon positions upon which the amino acid data were superimposed was significantly worse under the Templeton test than that inferred from parsimony analysis of these three data partitions (1<sup>st</sup> and 2<sup>nd</sup> codon sites and amino acid sequences;  $P < 0.05$ ).

### Phylogenetic relationships

Except for when the amino acid translations are analysed in combination with the full nucleotide data (Fig. 2B), the Andreaebryaceae and the Andreaeaceae, sole families of the Andreaeidae, never compose a monophyletic lineage (Figs 2 and 3). Of the remaining three orders recognized by Vitt (1984), namely the Polytrichales, Tetrarhizales and Bryales, the latter appears polyphyletic in all analyses as *Oedipodium* and *Buxbaumia*, sole members of their respective families, are consistently resolved outside the clade of arthrodonontous mosses. The Oedipodiaceae appear either closely related to the Tetrarhizaceae (Fig. 2A), intermediate between the Nematodontae and the Arthrodonontae (Fig. 3B), sister to all the nematodontous mosses (Fig. 3A) or even in a position sister to all peristomate



TABLE 1. *Alphabetical list of taxa included in the present analysis. All vouchers of newly sequenced taxa (bold type-face) are deposited in the herbarium of Duke University (NC, USA) unless otherwise indicated*

| Taxon                                                        | Voucher or reference               | GenBank accession number |
|--------------------------------------------------------------|------------------------------------|--------------------------|
| <i>Acroporium pungens</i> (Hedw.) Broth.                     | Buck <i>et al.</i> (2000)          | AF143028                 |
| <i>Adelothecium bogotense</i> (Hampe) Mitt.                  | Buck <i>et al.</i> (2000)          | AF143073                 |
| <i>Amblyodon dealbatus</i> (Hedw.) Bruch & W.P. Schimper     | Goffinet & Cox (2000)              | AF223062                 |
| <i>Amphidium lapponicum</i> (Hedw.) W.P. Schimper            | <b>Schofield 98098</b>             | AF222896                 |
| <i>Anacamptodon splachnoides</i> (Brid.) Brid.               | Buck <i>et al.</i> (2000)          | AF143031                 |
| <i>Andreaea rothii</i> Weber & D. Mohr                       | <b>Shaw s.n.</b>                   | AF306952                 |
| <i>Andreaobryum macrosporum</i> Steere & B.M. Murray         | <b>Schofield 78094</b>             | AF306953                 |
| <i>Anomobryum julaceum</i> (Gärtn., Meyer & Schreb.) Schimp. | Cox & Hedderson (1999)             | AF023786                 |
| <i>Anomodon rugelii</i> (C. Müll.) Keissler                  | Buck <i>et al.</i> (2000)          | AF143023                 |
| <i>Aphanorrhagma serratum</i> (W. J. Hooker & Wilson) Sull.  | Goffinet & Cox (2000)              | AF223047                 |
| <i>Aplodon wormskioldii</i> (Hornemann) R. Brown             | <b>Belland 11024</b>               | AF306964                 |
| <i>Archidium alternifolium</i> (Hedw.) Mitt.                 | <b>Mishler 3752</b>                | AF306982                 |
| <i>Archidium donnellii</i> Aust.                             | <b>Risk 1536</b>                   | AF223054                 |
| <i>Archidium tenerrimum</i> Mitt.                            | <b>Risk &amp; Kiser 5050</b>       | AF306981                 |
| <i>Atrichum angustatum</i> (Brid.) Buch & Schimp.            | <b>Hedderson 10393 (RNG)</b>       | AF265356                 |
| <i>Aulacomium androgynum</i> (Hedw.) Schwägr.                | Cox & Hedderson (1999)             | AF023811                 |
| <i>Aulacomium turgidum</i> (Wahl.) Schwägr.                  | Cox & Hedderson (1999)             | AF023809                 |
| <i>Aulacopilum hodgkinsoniae</i> (Hampe & C. Müll.) Broth.   | <b>Vitt 28261 (ALTA)</b>           | AF222897                 |
| <i>Barbula unquiculata</i> Hedw.                             | <b>Zander 1975 (BUF)</b>           | AF306986                 |
| <i>Bartramia halleriana</i> Hedw.                            | <b>Akeryod et al. 4491 (RNG)</b>   | AF265358                 |
| <i>Bartramia stricta</i> Brid.                               | Cox & Hedderson (1999)             | AF023799                 |
| <i>Bescherellia cryphaeoides</i> (Müll. Hal.) M. Fleisch.    | Buck <i>et al.</i> (2000)          | AF143081                 |
| <i>Blindia acuta</i> (Hedw.) Br. Eur.                        | Cox & Hedderson (1999)             | AF023781                 |
| <i>Brachylema subulatum</i> (P. de Beauv.) Card.             | <b>Allen Fontinalaceae Exc. 86</b> | AF306998                 |
| <i>Brachymentium pulchrum</i> Hook.                          | Cox & Hedderson (1999)             | AF023788                 |
| <i>Brachythecium austro-glaresum</i> (Müll.) Paris           | Buck <i>et al.</i> (2000)          | AF143026                 |
| <i>Brachythecium oxycladon</i> (Brid.) Jäg.                  | Buck <i>et al.</i> (2000)          | AF143025                 |
| <i>Brachythecium plumosum</i> (Hedw.) Schimp.                | Buck <i>et al.</i> (2000)          | AF143078                 |
| <i>Brachythecium rutabulum</i> (Hedw.) Br. Eur.              | Cox & Hedderson (1999)             | AF023818                 |
| <i>Brachythecium salebrosus</i> (Web. & Mohr.) Schimp.       | Buck <i>et al.</i> (2000)          | AF158176                 |
| <i>Braithwaitea sulcata</i> (Hook.) Jäg.                     | Cox & Hedderson (1999)             | AF023820                 |
| <i>Breutelia scoparia</i> (Schwägr.) Jäg.                    | Buck <i>et al.</i> (2000)          | AF143075                 |
| <i>Bryhnia novae-angliae</i> (Sull.) Grout                   | Buck <i>et al.</i> (2000)          | AF143029                 |
| <i>Bryobritonia longipes</i> (Will.) Horton                  | Cox & Hedderson (1999)             | AF023778                 |
| <i>Bryoxiphium norvegicum</i> (Brid.) Mitt.                  | Goffinet & Cox (2000)              | AF223037                 |
| <i>Bryum alpinum</i> With.                                   | Cox & Hedderson (1999)             | AF023783                 |
| <i>Bryum caespiticium</i> Hedw.                              | Cox & Hedderson (1999)             | AF023784                 |
| <i>Bryum donianum</i> Grev.                                  | Cox & Hedderson (1999)             | AF023785                 |
| <i>Bryum stenotrichum</i> C. M.                              | Cox & Hedderson (1999)             | AF023787                 |
| <i>Buxbaumia aphylla</i> Hedw.                               | <b>Belland 16889</b>               | AF306959                 |
| <i>Calomnion complanatum</i> (Hook. & Wils.) Lindb.          | <b>Streimann 58086 (NY)</b>        | AF307000                 |
| <i>Campylium chrysophyllum</i> (Brid.) Lange                 | Buck <i>et al.</i> (2000)          | AF143048                 |
| <i>Catagonium nitens</i> (Brid.) Card.                       | <b>Goffinet 5459</b>               | AF307001                 |
| <i>Catascopium nigratum</i> (Hedw.) Brid.                    | <b>Longton 4592 (RNG)</b>          | AF307003                 |
| <i>Chamaebryum pottioides</i> Thér. & Dixon                  | Goffinet & Cox (2000)              | AF223051                 |
| <i>Cinclidium stygium</i> Swartz                             | Cox & Hedderson (1999)             | AF023791                 |
| <i>Clasmatodon parvulus</i> (Hampe) Sull.                    | Buck <i>et al.</i> (2000)          | AF143032                 |
| <i>Climacium americanum</i> Brid.                            | Buck <i>et al.</i> (2000)          | AF143065                 |
| <i>Conostomum tetragonum</i> (Hedw.) Lindb.                  | <b>Goffinet 5755</b>               | AF306990                 |
| <i>Crossomitrium rotundifolium</i> Herz.                     | Buck <i>et al.</i> (2000)          | AF143070                 |
| <i>Cryphaea glomerata</i> Sull.                              | Buck <i>et al.</i> (2000)          | AF143007                 |
| <i>Ctenidium malacodes</i> Mitt.                             | Buck <i>et al.</i> (2000)          | AF143036                 |
| <i>Curvirameum mexicanum</i> (Thér.) Crum                    | Buck <i>et al.</i> (2000)          | AF143062                 |
| <i>Cyrtomnium hymenophyllum</i> (Bruch & Schimp.) Holmen     | Cox & Hedderson (1999)             | AF023792                 |
| <i>Dawsonia papuana</i> Schliephacke & Geheeb                | Hyvönen <i>et al.</i> (1998)       | AF208419                 |
| <i>Dendroligotrichum dendroides</i> (Hedw.) Brother.         | <b>Goffinet 5425</b>               | AF306957                 |
| <i>Dendroligotrichum squamosum</i> (Hook. & Wils.) Card.     | <b>Goffinet 5878</b>               | AF306958                 |
| <i>Diphyscium foliosum</i> (Hedw.) Mohr                      | Goffinet & Cox (2000)              | AF223034                 |
| <i>Discelium nudum</i> (Dicks.) Brid.                        | Goffinet & Cox (2000)              | AF223063                 |
| <i>Ditrichum pallidum</i> (Hedw.) Hampe                      | <b>Nelson 13749</b>                | AF306979                 |
| <i>Drummondia obtusifolia</i> C. Müll.                       | Goffinet & Cox (2000)              | AF223038                 |
| <i>Drummondia prorepens</i> (Hedw.) Britton                  | <b>Vitt 26711 (ALTA)</b>           | AF306977                 |
| <i>Echinodium umbrosum</i> (Mitt.) Jäg.                      | Buck <i>et al.</i> (2000)          | AF143044                 |
| <i>Encalypta armata</i> Dusén                                | Goffinet & Cox (2000)              | AF223039                 |
| <i>Encalypta ciliata</i> Hedw.                               | Goffinet & Cox (2000)              | AF223040                 |

Table 1 continued over page

TABLE 1. Continued

| Taxon                                                    | Voucher or reference              | GenBank accession number |
|----------------------------------------------------------|-----------------------------------|--------------------------|
| <i>Encalypta rhabdocarpa</i> Schwägr.                    | Cox & Hedderson (1999)            | AF023777                 |
| <i>Enthostodon drummondii</i> Sull.                      | <b>Shaw s.n.</b>                  | AF306961                 |
| <i>Enthostodon laevis</i> (Mitten) Fife                  | Goffinet & Cox (2000)             | AF223043                 |
| <i>Entodon brevisetus</i> (Wils.) Lindb.                 | Buck <i>et al.</i> (2000)         | AF143057                 |
| <i>Entodontopsis leucostega</i> (Brid.) Buck & Irel.     | Buck <i>et al.</i> (2000)         | AF143060                 |
| <i>Ephemerum spinulosum</i> Schimp.                      | Goffinet & Cox (2000)             | AF223055                 |
| <i>Fissidens bushii</i> (Card. & Thér.) Card. & Thér.    | <b>Goffinet 4526</b>              | AF306988                 |
| <i>Fissidens subbasilaris</i> Hedw.                      | Goffinet & Cox (2000)             | AF223056                 |
| <i>Fontinalis antipyretica</i> Hedw.                     | Cox & Hedderson (1999)            | AF023817                 |
| <i>Fontinalis dalicarllica</i> Bruch & Schimp.           | Buck <i>et al.</i> (2000)         | AF143064                 |
| <i>Forsstroemia trichomitria</i> (Hedw.) Lindb.          | Buck <i>et al.</i> (2000)         | AF143006                 |
| <i>Funaria hygrometrica</i> Hedw.                        | Cox & Hedderson (1999)            | AF023776                 |
| <i>Garovaglia elegans</i> (Dozy & Molk.) Bosch & Lac.    | Buck <i>et al.</i> (2000)         | AF023017                 |
| <i>Gigaspermum repens</i> (Hook.) Lindb.                 | Goffinet & Cox (2000)             | AF223049                 |
| <i>Glyphothecium sciuroides</i> (Hook.) Hampe            | Buck <i>et al.</i> (2000)         | AF143016                 |
| <i>Goniobryum subbasilare</i> (Hook.) Lindb.             | Cox & Hedderson (1999)            | AF023824                 |
| <i>Goniomitrium acuminatum</i> Hook. & Wils.             | Goffinet & Cox (2000)             | AF223057                 |
| <i>Grimmia pulvinata</i> (Hedw.) Smith                   | <b>Christy 21771</b>              | AF222900                 |
| <i>Haplocladium virginianum</i> (Brid.) Broth.           | Buck <i>et al.</i> (2000)         | AF143040                 |
| <i>Haplohymenium triste</i> (De Not.) Kindb.             | Buck <i>et al.</i> (2000)         | AF143022                 |
| <i>Hedwigia ciliata</i> (Hedw.) P. de Beauv.             | <b>Belland 17819</b>              | AF306997                 |
| <i>Helicodontium capillare</i> (Hedw.) Jaegr.            | Buck <i>et al.</i> (2000)         | AF143043                 |
| <i>Helicophyllum torquatum</i> (W.J. Hooker) Brid.       | <b>Newton 4813 (herb. Newton)</b> | AF265357                 |
| <i>Henicodium geniculatum</i> (Mitt.) W.R. Buck          | Buck <i>et al.</i> (2000)         | AF143011                 |
| <i>Hildebrandtiella pachyclada</i> Besch.                | Cox & Hedderson (1999)            | AF023829                 |
| <i>Homalotheciella subcapillata</i> (Hedw.) Broth.       | Buck <i>et al.</i> (2000)         | AF143061                 |
| <i>Hookeria acutifolia</i> Hook. & Grev.                 | Buck <i>et al.</i> (2000)         | AF143071                 |
| <i>Hygroamblystegium tenax</i> (Hedw.) C. Jensen         | Buck <i>et al.</i> (2000)         | AF143047                 |
| <i>Hypnodendron camptotheca</i> (Par.) Touw              | Cox & Hedderson (1999)            | AF023821                 |
| <i>Hypnodendron dendroides</i> (Brid.) Touw              | Cox & Hedderson (1999)            | AF023822                 |
| <i>Hypnum imponens</i> Hedw.                             | Buck <i>et al.</i> (2000)         | AF143034                 |
| <i>Hypnum lindbergii</i> Mitt.                           | Buck <i>et al.</i> (2000)         | AF143035                 |
| <i>Hypopterygium tamarisci</i> (Sw.) Müll. Hal.          | Buck <i>et al.</i> (2000)         | AF143077                 |
| <i>Isopterygium tenerum</i> (Hedw.) Sw.                  | Buck <i>et al.</i> (2000)         | AF143037                 |
| <i>Itatiella ulei</i> (C. Müll.) G.L. Smith              | Hyvönen <i>et al.</i> (1998)      | AF208421                 |
| <i>Lembophyllum divulgum</i> (Hook. & f. Wils.) Lindb.   | Buck <i>et al.</i> (2000)         | AF143045                 |
| <i>Lepidopilum scabrisetum</i> (Schwägr.) Steere         | Buck <i>et al.</i> (2000)         | AF143066                 |
| <i>Lepidopilum surinamense</i> Müll. Hal.                | Buck <i>et al.</i> (2000)         | AF143067                 |
| <i>Leptobryum pyriforme</i> (Hedw.) Wils.                | Cox & Hedderson (1999)            | AF023802                 |
| <i>Leptobryum stellatum</i> (Herz.) Broth.               | <b>Lewis 87-1222-d6</b>           | AF306991                 |
| <i>Leptobryum wilsonii</i> (Mitt.) Broth.                | <b>Goffinet 5608</b>              | AF306992                 |
| <i>Leptostomum macrocarpum</i> (Hedw.) R. Br.            | Cox & Hedderson (1999)            | AF023790                 |
| <i>Leptothea boliviana</i> Herz.                         | Cox & Hedderson (1999)            | AF023816                 |
| <i>Leptothea gaudichaudii</i> Schwägr.                   | Cox & Hedderson (1999)            | AF023823                 |
| <i>Lepyrodon pseudolagurus</i> Allen                     | Buck <i>et al.</i> (2000)         | AF143014                 |
| <i>Leskea gracilescens</i> Hedw.                         | Buck <i>et al.</i> (2000)         | AF143042                 |
| <i>Leskeodon cubensis</i> (Mitt.) Thér.                  | Buck <i>et al.</i> (2000)         | AF143072                 |
| <i>Leucodon andrewsianum</i> (Crum & Anders.) Reese      | Buck <i>et al.</i> (2000)         | AF143005                 |
| <i>Leucodon brachypus</i> Brid.                          | Buck <i>et al.</i> (2000)         | AF143004                 |
| <i>Leucoloma sp. nov.</i>                                | <b>La Farge 5555 (ALTA)</b>       | AF307005                 |
| <i>Leucomium strumosum</i> (Hornsch.) Mitt.              | Buck <i>et al.</i> (2000)         | AF143068                 |
| <i>Loeskeobryum brevirostre</i> (Brid.) Broth.           | Buck <i>et al.</i> (2000)         | AF143079                 |
| <i>Lorentziella imbricata</i> (Mitt.) Broth.             | Goffinet & Cox (2000)             | AF223052                 |
| <i>Macromitrium richardii</i> Schwägr.                   | <b>Goffinet 2648 (ALTA)</b>       | AF306975                 |
| <i>Macromitrium levatum</i> Mitt.                        | Cox & Hedderson (1999)            | AF023813                 |
| <i>Meesia triquetra</i> (Richter) Ångström               | <b>Schofield 99251A</b>           | AF306994                 |
| <i>Meesia uliginosa</i> Hedw.                            | <b>Schofield 93204</b>            | AF306995                 |
| <i>Meiotrichum lyallii</i> (Mitt.) G.L.S. Merrill        | Hyvönen <i>et al.</i> (1998)      | AF208423                 |
| <i>Mielichhoferia bryoides</i> (Harv.) Wijk & Marg.      | Cox & Hedderson (1999)            | AF023794                 |
| <i>Mielichhoferia elongata</i> (Hook.) Hornsch.          | Cox & Hedderson (1999)            | AF023793                 |
| <i>Mielichhoferia macrocarpa</i> (Hook.) Bruch & Schimp. | Hedderson 5487 (RNG)              | AJ251311                 |
| <i>Mittenia plumosa</i> (Mitt.) Lindb.                   | <b>Streimann 5/12/96</b>          | AF306999                 |
| <i>Mitthyridium constrictum</i> (Sull.) Robins.          | <b>Withey 560</b>                 | AF306987                 |
| <i>Mnium hornum</i> Hedw.                                | Cox & Hedderson (1999)            | AF023796                 |
| <i>Muscoflopschuetzia pilmaiquen</i> (Crosby) Crosby     | <b>Isotype (H)</b>                | AF306960                 |
| <i>Myurium hochstetteri</i> (Schimp.) Kindb.             | Buck <i>et al.</i> (2000)         | AF143018                 |

Table 1 continued over page

TABLE 1. *Continued*

| Taxon                                                         | Voucher or reference                | GenBank accession number |
|---------------------------------------------------------------|-------------------------------------|--------------------------|
| <i>Neckera pennata</i> Hedw.                                  | Buck <i>et al.</i> (2000)           | AF143008                 |
| <i>Neckeropsis disticha</i> (Hewd.) Kindb.                    | Buck <i>et al.</i> (2000)           | AF143010                 |
| <i>Neomeesia palludella</i> (Besch.) Deguchi                  | <b>Goffinet 5862</b>                | AF306993                 |
| <i>Neorutenbergia usagarae</i> (Dix.) Bizot & Pócs            | Buck <i>et al.</i> (2000)           | AF143019                 |
| <i>Oedipodium griffithianum</i> (Dicks.) Schwägr.             | <b>Schofield 98670</b>              | AF306968                 |
| <i>Orthodontium lineare</i> Schwägr.                          | Cox & Hedderson (1999)              | AF023800                 |
| <i>Orthostichopsis tetragona</i> (Hedw.) Broth.               | Buck <i>et al.</i> (2000)           | AF143012                 |
| <i>Orthotrichum alpestre</i> B.S.G.                           | <b>Vitt Orthotrichaceae Exc. 47</b> | AF306971                 |
| <i>Orthotrichum anomalum</i> Hedw.                            | <b>Vitt Orthotrichaceae Exc. 43</b> | AF306973                 |
| <i>Orthotrichum lyellii</i> Hook. & Tayl.                     | Cox & Hedderson (1999)              | AF023814                 |
| <i>Orthotrichum obtusifolium</i> Brid.                        | <b>Schofield 98451</b>              | AF306969                 |
| <i>Paludella squarrosa</i> (Hedw.) Brid                       | <b>Vitt 34205</b>                   | AF306996                 |
| <i>Papillaria nigrescens</i> (Hedw.) Jägr.                    | Buck <i>et al.</i> (2000)           | AF143051                 |
| <i>Pentastichella penstaticum</i> (Mont.) Thér.               | <b>Matteri 6527</b>                 | AF306973                 |
| <i>Philonotis fontana</i> (Hedw.) Brid.                       | Cox & Hedderson (1999)              | AF023801                 |
| <i>Phyllorepanium falcifolium</i> (Schwägr.) Crosby           | Buck <i>et al.</i> (2000)           | AF143074                 |
| <i>Phyllogonium viride</i> Brid.                              | Buck <i>et al.</i> (2000)           | AF143020                 |
| <i>Physcomitrium lorentzii</i> Müll. Hall.                    | Goffinet & Cox (2000)               | AF223046                 |
| <i>Physcomitrium pyriforme</i> (Hedw.) Hampe                  | Goffinet & Cox (2000)               | AF223045                 |
| <i>Pilosium chlorophyllum</i> (Hornsch.) Müll. Hal.           | Buck <i>et al.</i> (2000)           | AF143059                 |
| <i>Pilotrichella flexilis</i> (Hedw.) Ängstr.                 | Buck <i>et al.</i> (2000)           | AF143046                 |
| <i>Pilotrichum fendleri</i> Müll. Hal.                        | Buck <i>et al.</i> (2000)           | AF143069                 |
| <i>Plagiomnium affine</i> (Funck) T. Kop.                     | Cox & Hedderson (1999)              | AF023797                 |
| <i>Plagiopus oederi</i> (Brid.) Limpr.                        | Cox & Hedderson (1999)              | AF023833                 |
| <i>Plagiothecium cavifolium</i> (Brid.) Z. Iwats.             | Buck <i>et al.</i> (2000)           | AF143080                 |
| <i>Plagiothecium laetum</i> Bruch & Schimp.                   | Buck <i>et al.</i> (2000)           | AF143058                 |
| <i>Platygyrium repens</i> (Brid.) Schimp.                     | Buck <i>et al.</i> (2000)           | AF143038                 |
| <i>Pleuroidium subulatum</i> (Hedw.) Rabenh.                  | <b>Anderson 27634</b>               | AF306980                 |
| <i>Pleurophasium occidentale</i> Wyatt & Stoneburner          | <b>Wyatt 4385a</b>                  | AF306963                 |
| <i>Pohlia bolanderii</i> (Lesq.) Broth.                       | Cox & Hedderson (1999)              | AF023798                 |
| <i>Pohlia cruda</i> (Hedw.) Lindb.                            | Cox & Hedderson (1999)              | AF023795                 |
| <i>Polytrichum pallidisetum</i> Funck                         | <b>Goffinet 4581</b>                | AF306956                 |
| <i>Porotrichum vancouveriensis</i> (Kindb. Ex Mac.) Crum      | Cox & Hedderson (1999)              | AF023830                 |
| <i>Prionodon densus</i> (Hedw.) Müll. Hall.                   | Buck <i>et al.</i> (2000)           | AF143076                 |
| <i>Pseudocryphaea dominguense</i> (Spreng.) Buck              | Buck <i>et al.</i> (2000)           | AF143063                 |
| <i>Pseudoscleropodium purum</i> (Hedw.) Fleisch.              | Buck <i>et al.</i> (2000)           | AF143030                 |
| <i>Pterobryella praenitens</i> C. Müll.                       | <b>Sireimann 56079 (NY)</b>         | AF307002                 |
| <i>Pterobryon densum</i> Hornsch.                             | Buck <i>et al.</i> (2000)           | AF143013                 |
| <i>Ptychomitrium gardneri</i> Lesq.                           | Cox & Hedderson (1999)              | AF023779                 |
| <i>Ptychomnion aciculare</i> (Brid.) Mitt.                    | Buck <i>et al.</i> (2000)           | AF143015                 |
| <i>Pylaisiadelpha tenuirostre</i> (Sull.) Buck.               | Buck <i>et al.</i> (2000)           | AF143053                 |
| <i>Pyrrhobryum spiniforme</i> (Hedw.) Mitt.                   | Cox & Hedderson (1999)              | AF023832                 |
| <i>Pyrrhobryum vallis-gratiae</i> (Hampe) Manuel              | Cox & Hedderson (1999)              | AF023825                 |
| <i>Rhabdoweisia crispata</i> (Wither.) Lindb.                 | <b>Goffinet 4553</b>                | AF222899                 |
| <i>Rhachithecium papillosum</i> (Williams) Wijk & Marg.       | <b>Pócs &amp; Lye 97123/A (EGR)</b> | AF306978                 |
| <i>Rhacocarpus purpurascens</i> (Brid.) Par.                  | Cox & Hedderson (1999)              | AF023815                 |
| <i>Rhizogonium lindigii</i> (Hampe) Mitt.                     | Cox & Hedderson (1999)              | AF023826                 |
| <i>Rhizogonium nova-hollandiae</i> (Brid.) Brid.              | Cox & Hedderson (1999)              | AF023827                 |
| <i>Rhodobryum giganteum</i> (Schwägr.) Par.                   | Cox & Hedderson (1999)              | AF023789                 |
| <i>Rhytidiadelphus squarrosus</i> (Hedw.) Warnst.             | Buck <i>et al.</i> (2000)           | AF143033                 |
| <i>Sanionia georgico-uncinata</i> (C. Müll.) Ochyra & Hedenäs | Buck <i>et al.</i> (2000)           | AF143049                 |
| <i>Schistostega pennata</i> (Hedw.) Webr & D. Mohr            | <b>Hedderson s.n. (RNG)</b>         | AF265359                 |
| <i>Schlotheimia rugifolia</i> (Hooker) Schwägr.               | <b>Anderson 26352</b>               | AF306976                 |
| <i>Schwetschkeopsis fabronia</i> (Schwägr.) Broth.            | Buck <i>et al.</i> (2000)           | AF143041                 |
| <i>Scopelophila cataractae</i> (Mitt.) Broth.                 | <b>Shaw &amp; Ben 5/1988</b>        | AF306983                 |
| <i>Scouleria aquatica</i> Hook.                               | <b>Schofield 102594</b>             | AF306984                 |
| <i>Sematophyllum demissum</i> (Wils.) Mitt.                   | Buck <i>et al.</i> (2000)           | AF143055                 |
| <i>Sphagnum perichaetiale</i> Hampe                           | <b>Shaw 9213</b>                    | AF306951                 |
| <i>Sphagnum tenerum</i> Sull.                                 | <b>Shaw 9335</b>                    | AF307004                 |
| <i>Spiridens reinwardtii</i> Nees.                            | Cox & Hedderson (1999)              | AF023828                 |
| <i>Splachnobryum obtusum</i> (Brid.) C. Müll.                 | <b>Churchill et al. 17135 (H)</b>   | AF306962                 |
| <i>Splachnum luteum</i> Hedw.                                 | Cox & Hedderson (1999)              | AF023805                 |
| <i>Splachnum sphaericum</i> Hedw.                             | Goffinet & Cox (2000)               | AF223059                 |
| <i>Stegonia latifolia</i> (Schwägr.) Broth.                   | <b>La Farge 10/08/90 (ALTA)</b>     | AF222901                 |
| <i>Takakia lepidozoioides</i> Hattori & Inoue                 | <b>Schofield 86563</b>              | AF306950                 |
| <i>Taxithelium planum</i> (Brid.) Mitt.                       | Buck <i>et al.</i> (2000)           | AF143054                 |

Table 1 continued over page

TABLE 1. *Continued*

| Taxon                                                   | Voucher or reference              | GenBank accession number |
|---------------------------------------------------------|-----------------------------------|--------------------------|
| <i>Tayloria lingulata</i> (Dicks.) Lindb.               | Cox & Hedderson (1999)            | AF023807                 |
| <i>Tayloria orthodontia</i> (P. Beauv.) Demar.          | Cox & Hedderson (1999)            | AF023808                 |
| <i>Tayloria splachnoides</i> (Schwägr.) Hook.           | <b>De Luna 209</b>                | AF306965                 |
| <i>Tetraphis geniculata</i> Milde                       | <b>Schofield 103022</b>           | AF306955                 |
| <i>Tetraphis pellucida</i> Hedw.                        | <b>Goffinet 4542</b>              | AF306954                 |
| <i>Tetraplodon lamii</i> Reimers                        | <b>De Sloover 43076</b>           | AF306966                 |
| <i>Tetraplodon mnioides</i> (Hedw.) Br. Eur.            | Cox & Hedderson (1999)            | AF023804                 |
| <i>Thamnobryum alleghaniense</i> (Müll. Hal.) Nieuwl.   | Buck <i>et al.</i> (2000)         | AF143009                 |
| <i>Thamnobryum alopecurum</i> (Hedw.) Nieuwl.           | Cox & Hedderson (1999)            | AF023834                 |
| <i>Thelia asprella</i> (Schimp.) Sull.                  | <b>Goffinet 4520</b>              | AF306989                 |
| <i>Thelia lescurii</i> Sull.                            | Buck <i>et al.</i> (2000)         | AF143039                 |
| <i>Theriotia lorifolia</i> Card.                        | Goffinet & Cox (2000)             | AF223036                 |
| <i>Thuidium delicatulum</i> (Hedw.) Bruch & Schimp.     | Buck <i>et al.</i> (2000)         | AF143039                 |
| <i>Thuidium tamariscinum</i> (Hedw.) Br. Eur.           | Cox & Hedderson (1999)            | AF023819                 |
| <i>Timmia austriaca</i> Hedw.                           | Goffinet & Cox (2000)             | AF223035                 |
| <i>Timmia megapolitana</i> Hedw.                        | <b>Schofield 97957</b>            | AF222902                 |
| <i>Timmia sibirica</i> Lind. & Arnell                   | Cox & Hedderson (1999)            | AF023775                 |
| <i>Tortula ruralis</i> (Hedw.) Gaertn., Meyer & Schreb. | Cox & Hedderson (1999)            | AF023831                 |
| <i>Trachyloma diversinerve</i> Hampe                    | Buck <i>et al.</i> (2000)         | AF143021                 |
| <i>Trachypus bicolor</i> Reinw. & Hornsch.              | Buck <i>et al.</i> (2000)         | AF143052                 |
| <i>Uleastrum paraguense</i> (Besch.) Buck               | <b>Zardini &amp; Aquino 32310</b> | AF222898                 |
| <i>Ulota crispa</i> (Hedw.) Brid.                       | <b>Goffinet 4535</b>              | AF306972                 |
| <i>Ulota phyllantha</i> Brid.                           | Cox & Hedderson (1999)            | AF023812                 |
| <i>Voitia hyperborea</i> Greville & Arnott              | <b>Scotter 7/27/1990 (ALTA)</b>   | AF306967                 |
| <i>Wardia hygrometrica</i> Hook.                        | Cox & Hedderson (1999)            | AF023782                 |
| <i>Weissia ludoviciana</i> (Sull.) Reese & Lemmon -     | <b>Reese 11412 (BUF)</b>          | AF306985                 |
| <i>Zelometeorium patulum</i> (Hedw.) Manuel             | Buck <i>et al.</i> (2000)         | AF143050                 |
| <i>Zygodon viridissimus</i> (Dicks.) Brid.              | <b>Goffinet 4580</b>              | AF306974                 |

TABLE 2. *Variation, parsimony informativeness, and base composition of the rps4 gene, its codon-defined partitions and its protein translation*

|                       | <i>Rps4</i> total | 1 <sup>st</sup> codon position | 2 <sup>nd</sup> codon position | 3 <sup>rd</sup> codon position | Amino acids |
|-----------------------|-------------------|--------------------------------|--------------------------------|--------------------------------|-------------|
| Number of:            |                   |                                |                                |                                |             |
| constant characters   | 152               | 59                             | 86                             | 7                              | 52          |
| autapomorphic         | 90                | 33                             | 34                             | 23                             | 41          |
| parsimony informative | 328               | 98                             | 70                             | 160                            | 97          |
| (%)                   | 58                | 52                             | 37                             | 84                             | 51          |
| Composition           |                   |                                |                                |                                |             |
| A                     | 0.40              | 0.35                           | 0.38                           | 0.48                           |             |
| C                     | 0.14              | 0.21                           | 0.17                           | 0.06                           |             |
| G                     | 0.14              | 0.21                           | 0.15                           | 0.06                           |             |
| T                     | 0.32              | 0.23                           | 0.30                           | 0.43                           |             |

TABLE 3. *Parameters relating to the four combinations of data partitions of the rps4 gene sequences and their amino acid translations, statistics of optimal trees obtained from their analysis under maximum parsimony*

|                              | <i>Rps4</i> | <i>Rps4</i> + AA | <i>Rps4</i><br>(3 <sup>rd</sup> codon omitted) | <i>Rps4</i> + AA<br>(3 <sup>rd</sup> codon omitted) |
|------------------------------|-------------|------------------|------------------------------------------------|-----------------------------------------------------|
| Number of characters         | 570         | 760              | 380                                            | 570                                                 |
| $g_1$ statistic              | -0.2266     | -0.2348          | -0.1790                                        | -0.1669                                             |
| Length of MPT                | 2584        | 3451             | 1154                                           | 1993                                                |
| Number of MPTs               | 20-000      | 30-000           | 20-000                                         | 20-000                                              |
| CI                           | 0.2682      | 0.2822           | 0.3076                                         | 0.3191                                              |
| CI (autapomorphies excluded) | 0.2369      | 0.2483           | 0.2595                                         | 0.2736                                              |
| RI                           | 0.6803      | 0.6046           | 0.7223                                         | 0.7325                                              |
| RE                           | 0.1824      | 0.1960           | 0.2222                                         | 0.2338                                              |



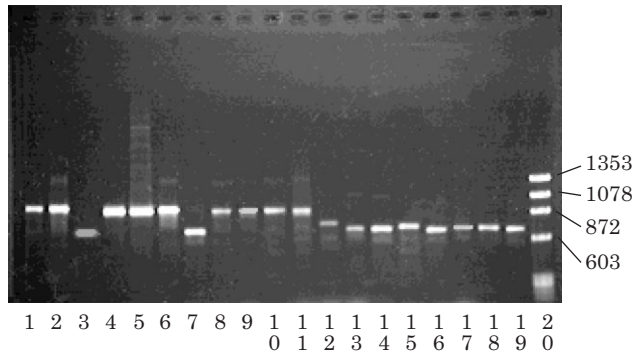

FIG. 1. Size variation in the amplicon comprising the *rps4* gene and the 3' intergenic spacer. Lane 1. *Takakia lepidozooides*; 2. *Sphagnum perichaetiale*; 3. *Ambuchanania leucobryoides*; 4. *Andreaea rupestris*; 5. *Andreaebryum macrocarpon*; 6. *Oedipodium griffithianum*; 7. *Buxbaumia aphylla*; 8. *Tetraphis pellucida*; 9. *T. geniculata*; 10. *Polytrichum pallidisetum*; 11. *Dendrologotrichum dendroides*; 12. *Theriotia lorifolia*; 13. *Diphyscium foliosum*; 14. *Timmia austriaca*; 15. *Enthostodon laevis*; 16. *Encalypta armata*; 17. *Fissidens subbasilaris*; 18. *Neomeesia paludella*; 19. *Catagonium nitens*; 20. phi-X DNA digested by *HaeIII* (numbers on right indicate approximate size of fragments in nucleotides).

mosses (Fig. 2B). The Buxbaumiineae are also consistently resolved as a polyphyletic assemblage, but the affinities of its two families remain somewhat uncertain: the Diphysciaceae form a sister clade to the arthroodontous mosses (i.e. the Bryales) in all analyses except when the reduced set of nucleotide characters is analysed (Fig. 3A), whereas the Buxbaumiaceae are affiliated with the nematodontous mosses, being either sister to the Tetraphidaceae (Fig. 2) or the Polytrichaceae (Fig. 3). The Nematodontae (i.e. the Tetraphidales, Buxbaumiaceae and Polytrichales) are resolved as a monophyletic group in the strict consensus upon inclusion of amino acid data (Figs 2B and 3B), and in 90 % of the MPTs derived from nucleotide data alone (Figs 2A and 3A).

The remaining Bryales (i.e. *sensu* Vitt but excluding the Oedipodiaceae and Buxbaumiaceae) compose a monophyletic group in all analyses. Although the relationships are poorly supported by bootstrap percentages, several trends emerge. The Funariineae *sensu* Vitt (1984) are always resolved as a polyphyletic. Except for when the first and second codon positions are analysed independently (Fig. 3A), the Funariaceae, Gigaspermaceae and Disceliaceae form a polyphyletic group, with the Encalyptaceae nested between them. Together these four families are resolved as a natural lineage when amino acid sequences complement the nucleotide data in the analysis, and even in the absence of the protein data this lineage occurs in 99 % of all most parsimonious trees recovered (Figs 2 and 3). The Timmiaceae are resolved in 90 % (Figs 2A and 3A) or all (Figs 2B and 3B) of the MPTs with this lineage of Funariineae-Encalyptineae. The genera *Drummondia* and *Scouleria*, which compose a monophyletic group in all most parsimonious trees in each of the four analyses, represent in most or all cases a sister group to the large clade comprising the Timmiaceae, Encalyptineae and Funariineae (TEF-clade; Figs 2B, 3A and B). Only when all data partitions of the *rps4* sequences are analysed together does the *Drummondia*/

*Scouleria* clade show the expected affinities to the Haplolepidaceae (Fig. 2A). By contrast *Bryoxiphium*, the sole member of the Bryoxiphiaceae, exhibits affinities to other haplolepidaceous mosses, except when only the first and second codon positions are included in the analyses, in which case *Bryoxiphium* appears sister to *Drummondia* and *Scouleria*.

The inclusion of amino acid sequences in the analyses leads to the Haplolepidaceae and *Bryoxiphium* composing the sister group to the above described TEF-clade in all optimal topologies (Figs 2B and 3B). This relationship is also present in 99 % of all most parsimonious trees recovered when the full nucleotide data set is analysed. By contrast, the exclusion of the third codon position in the absence of protein data results in the Haplolepidaceae being resolved as sister to the clade comprising diplolepidaceous mosses with alternate peristomes. Noteworthy here is the consistent inclusion of the Archidiineae in a nested position within the Haplolepidaceae, mostly close to the Grimmiineae and the Seligeriineae (Fig. 4). Similarly, the Schistostegaceae occur in all optimal topologies in the Haplolepidaceae, rather than within the Bryaceae (Fig. 4). By contrast, the Pleurophascaceae, a family containing two species of cleistocarpous and aperistomate mosses, is consistently (i.e. in all most parsimonious trees) resolved in a sister position to the Bryaceae (see below), rather than within the Haplolepidaceae (Fig. 5). Furthermore, three analyses (e.g. Fig. 4) concur with Goffinet *et al.* (1998) and Stech (1999) in resolving the genus *Amphidium* in the Haplolepidaceae. One exception occurred when the third codon positions were excluded in the presence of protein data, in which case *Amphidium* was resolved as the most basal Arthroodontous moss (Fig. 3B). The monospecific Catascopiaceae were consistently resolved within this large clade (TEF-clade + Haplolepidaceae), rather than the Bryaceae. In three of the four analyses, the affinities of the Catascopiaceae lay with the Funariineae/Encalyptineae ± Timmiaceae (Figs 2B and 3A,B), but the family was more closely related to the Haplolepidaceae and *Bryoxiphium* when the full nucleotide data set was analysed alone (Fig. 2A).

Diplolepidaceous mosses with alternate peristomes compose a monophyletic lineage in all MPTs inferred from the four analyses. The Orthotrichaceae are consistently resolved as monophyletic. Species of *Pohlia* (Bryaceae) always associate with *Phyllocladon* and the Mniaceae, as do the Splachnaceae with the Meesiaceae and *Leptobryum* (Bryaceae). The remaining Bryaceae, with the exception of *Orthodontium*, consistently compose a monophyletic lineage with *Pleurophascum* and the Leptostomataceae. The position of *Pleurophascum* in the Bryaceae is tentative since the sequence is not complete, and should thus be tested further. *Orthodontium lineare* never occurred close to other Bryaceae, but instead consistently showed affinities to *Leptotheca* (Rhizogoniaceae), and in particular to *L. boliviana*. Species of both *Leptotheca* and *Orthodontium* formed a monophyletic group when the third codon positions were excluded from the analyses (Fig. 3A and B).

The Rhizogoniaceae are always resolved as a polyphyletic assemblage, with species of *Leptotheca* either allied to *Orthodontium* or to such families as the Hedwigiaceae or Orthotrichaceae (Figs 2 and 3). *Pyrrobryum vallis-gratie*



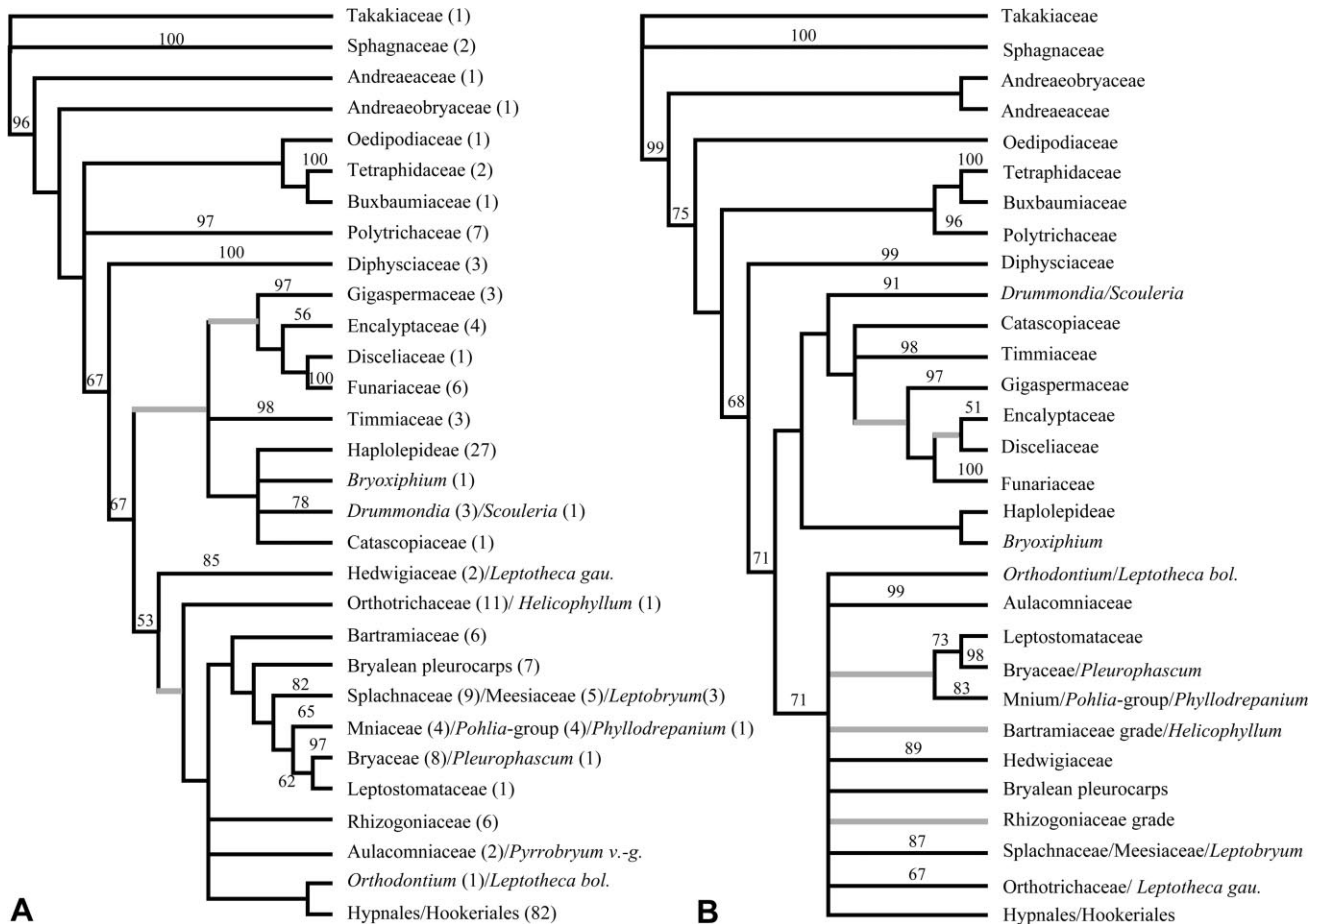

FIG. 2. A, Summarized 90 % majority-rule consensus tree of 20 000 most parsimonious trees inferred from analysing the *rps4* gene sequences (i.e. all codon positions included). Values following taxa refer to number of exemplars composing the lineage. B, Summarized 90 % majority-rule consensus tree of 30 000 most parsimonious trees inferred from analysing the *rps4* gene sequences (i.e. all codon positions included) in combination with their amino acid translation. Grey branches correspond to branches collapsing in the strict consensus. Values above branches correspond to frequencies of occurrence of branches among the trees recovered from 5000 fast bootstrap replicates.

also never associated with its congener *P. spiniforme*. By contrast, the monogeneric families Calomniaceae and Mitteniaceae consistently occurred as sister to *P. spiniforme* and the *Rhizogonium-Goniobryum* clade, respectively. Members of these five genera (except for *P. vallis-gratiae*) formed a monophyletic group only when nucleotide sequences alone were analysed. The Bartramiaceae formed a monophyletic group only when all the nucleotide sites were included in the analysis with or without the protein sequences. Members of the Cyrtopodaceae, Hypnodendraceae, Spiridentaceae and *Pterobryella*, here termed the Bryalean pleurocarps, composed a monophyletic lineage only when the 3<sup>rd</sup> codon positions were included in the analysis (Figs 2A and 3B). Finally, all exemplars of the Hypnaceae *s. l.* and Hookeriaceae, a group traditionally named the pleurocarps (Hypnidae *sensu* Buck *et al.*, 2000), formed a monophyletic lineage in all MPTs.

## DISCUSSION

Phylogenetic analyses of nucleotide sequences of the *rps4* gene and its amino acid translations using *Takakia* and the

Sphagnidae as an outgroup converge towards an overall evolutionary history of mosses wherein (1) the mono- or paraphyletic Andreaeidae are ancestral to a dichotomy between nematodontous and arthroodontous mosses; (2) the Buxbaumiaceae are polyphyletic, with the Diphysciaceae composing a sister lineage to the remaining Bryales *sensu* Vitt (1984); and (3) the Funariaceae, Encalyptaceae, Timmiaceae and the Haplolepideae compose a monophyletic lineage sister to mosses with alternating peristomes (e.g. Bryineae, Orthotrichineae, Hypnaceae). Furthermore, the extensive taxon sampling suggests placements for several groups that are at odds with traditional classifications (e.g. Pleurophascaceae, Catascopiaceae).

### Suitability of the data

The  $g_1$  statistic (Table 3) of the distribution of 50 000 random trees indicates that all four combinations of data partitions used here are significantly more structured than random data sets of equal size (see reference values provided by Hillis and Huelsenbeck, 1992), suggesting that the DNA sequence variation is not random with respect to phylogeny.

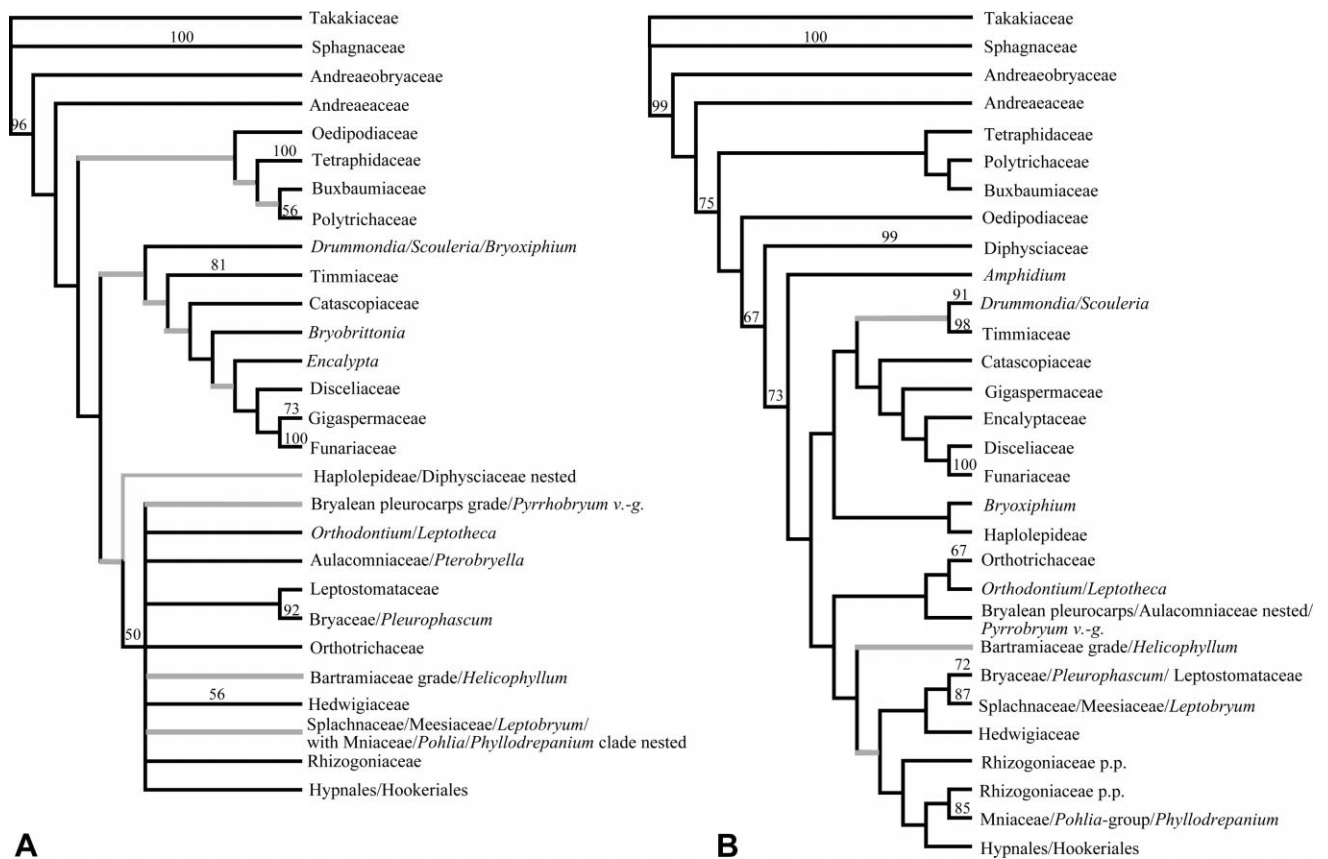

FIG. 3. A, Summarized 90 % majority-rule consensus tree of 20 000 most parsimonious trees inferred from analysing the first and second codon positions of *rps4* gene sequences (i.e. excluding the third codon positions). B, Summarized 90 % majority rule consensus tree of 20 000 most parsimonious trees inferred from analysing first and second codon positions of *rps4* gene sequences in combination with the amino acid translation of the complete sequences. Grey branches correspond to branches collapsing in the strict consensus. Values above branches correspond to frequencies of occurrence of branches among the trees recovered from 5000 fast bootstrap replicates.

Although the congruence among most parsimonious topologies inferred from four different combinations of nucleotide and protein partitions is high with regard to the above relationships, the deeper dichotomies (i.e. at the suprafamilial level) are in general poorly supported by the bootstrap (< 73 %).

The suitability of a data set is often assessed by the frequency of dichotomies well supported by bootstrapping. The overall lack of support in the *rps4* phylogeny is consistent with extensive taxon sampling combined with the comparatively small number of characters sampled. Sanderson and Donogue (1989) demonstrated that an increase in numbers of exemplars is accompanied by a decrease in the consistency index, and thus an increase in homoplasy. It is the latter that accounts for the incongruence among trees obtained by bootstrapping, and the lack of swapping as implemented in the fast bootstrap analysis probably accentuates this effect as the search for most parsimonious topologies is relaxed. Poor overall support for a topology does not, of course, preclude the phylogeny from being accurate; for example, the traditional pleurocarps, i.e. Hypnaceae, Leucodontiineae and Hookeriaceae, which are represented here by 82 exemplars, compose a monophyletic group in all analyses presented here (see also

Buck et al., 2000; De Luna et al., 2000), yet fail to obtain a bootstrap value of 50 % or more. However, since the true phylogeny is rarely known, and such is the case for mosses, the accuracy *per se* of the data cannot, in those cases, be established. What remains is circumstantial evidence. Does the information from the data significantly differ from a random data set of identical dimensions? Does the most parsimonious gene tree differ significantly from alternative phylogenetic hypotheses? How does the resulting phylogeny agree with traditional morphology-based concepts?

As is typical for protein coding genes, rates of evolution differ among codon positions, with the third codon positions accumulating mutations at a higher rate than the first or the second positions (Olmstead et al., 1998). Consequently the former partition is often characterized by a higher level of homoplasy. Nevertheless, the third codon positions may carry a phylogenetic signal that contributes to the overall resolution of the relationships (Lewis et al., 1997). The exclusion of the third codon positions from the analyses resulted in a dramatic decrease in resolution in the strict consensus and a general decrease in bootstrap values, suggesting greater character conflict or less phylogenetic signal in these remaining sites, or simply the lack of enough characters. An alternative to excluding the partition is to

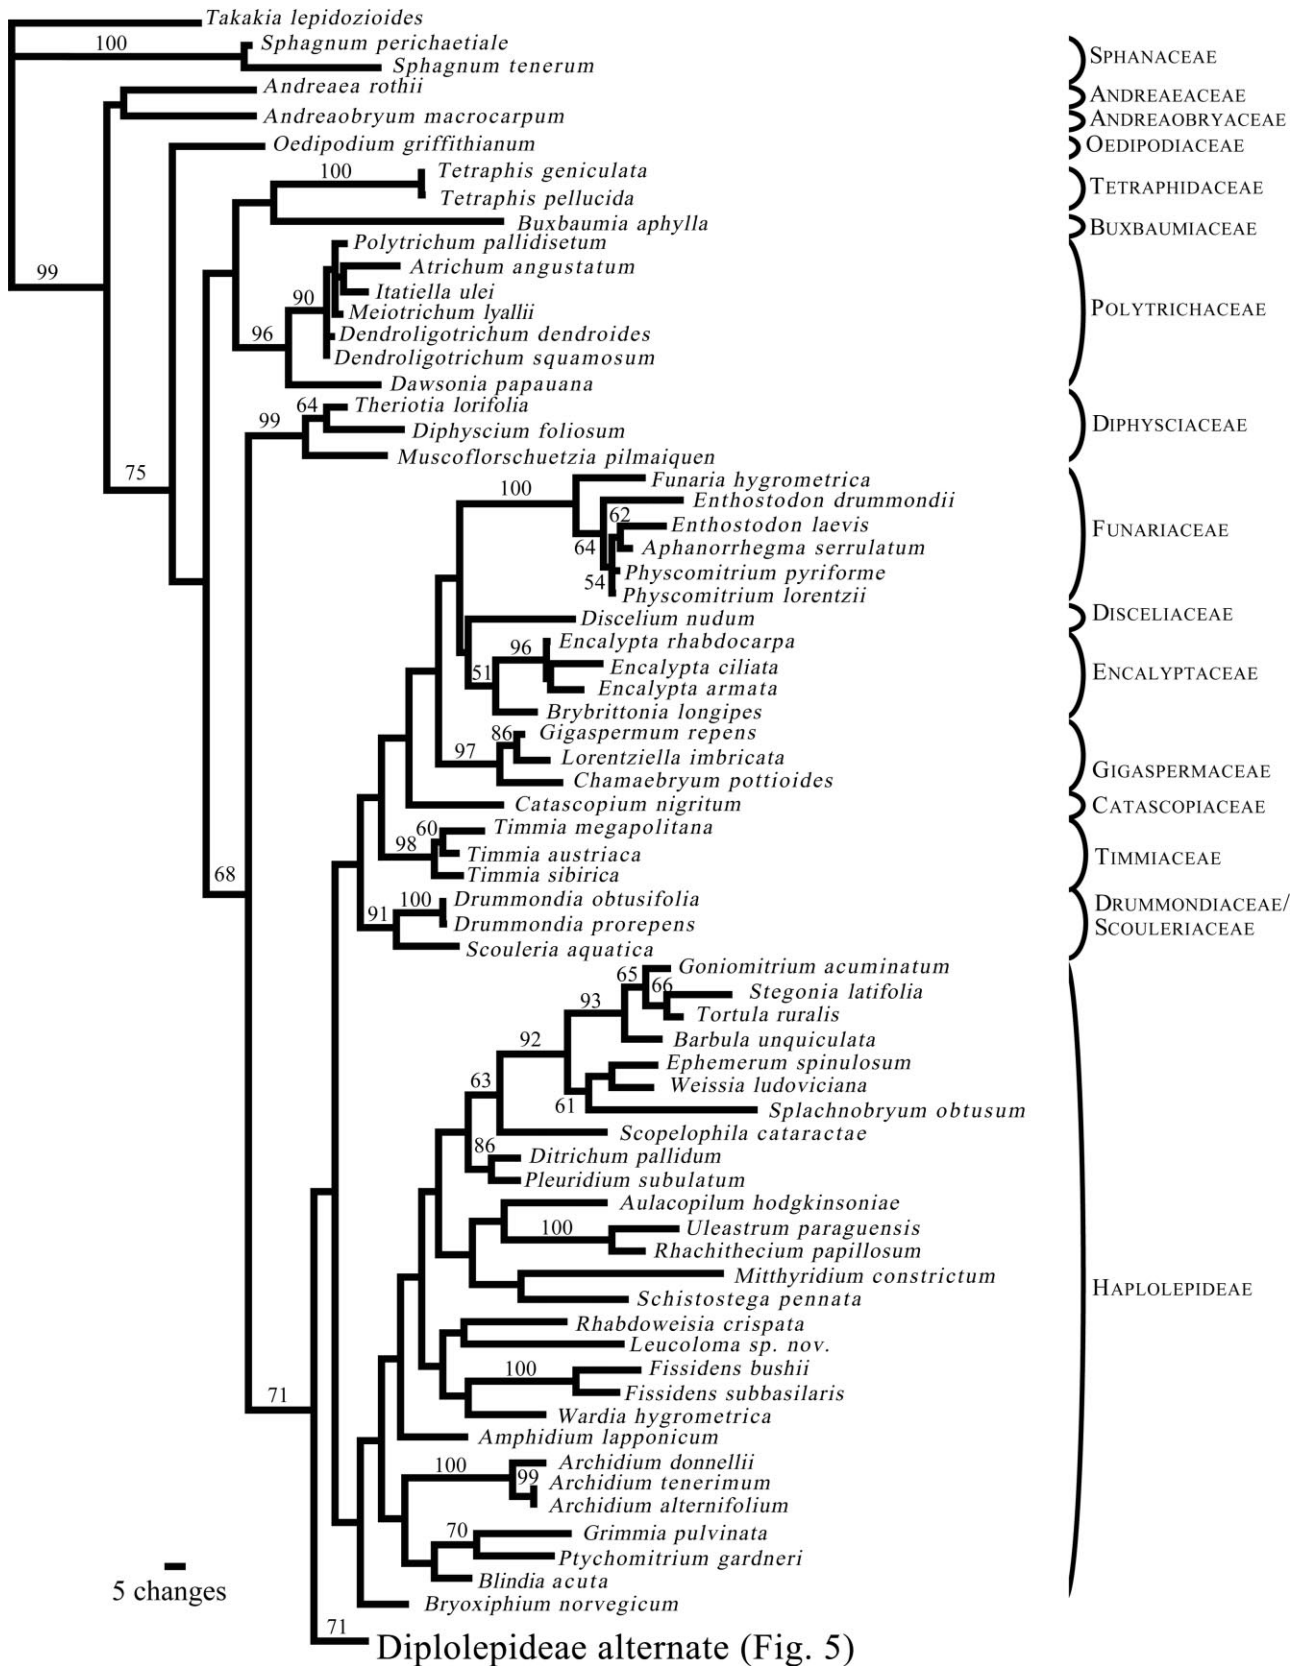

FIG. 4. Portion of the phylogram of the first most parsimonious tree (island one) inferred from the analysis of *rps4* gene complemented by its amino acid translation. Only relationships among and within basal lineages are shown here. Branch lengths are obtained following optimization by accelerated transformation of character-states.

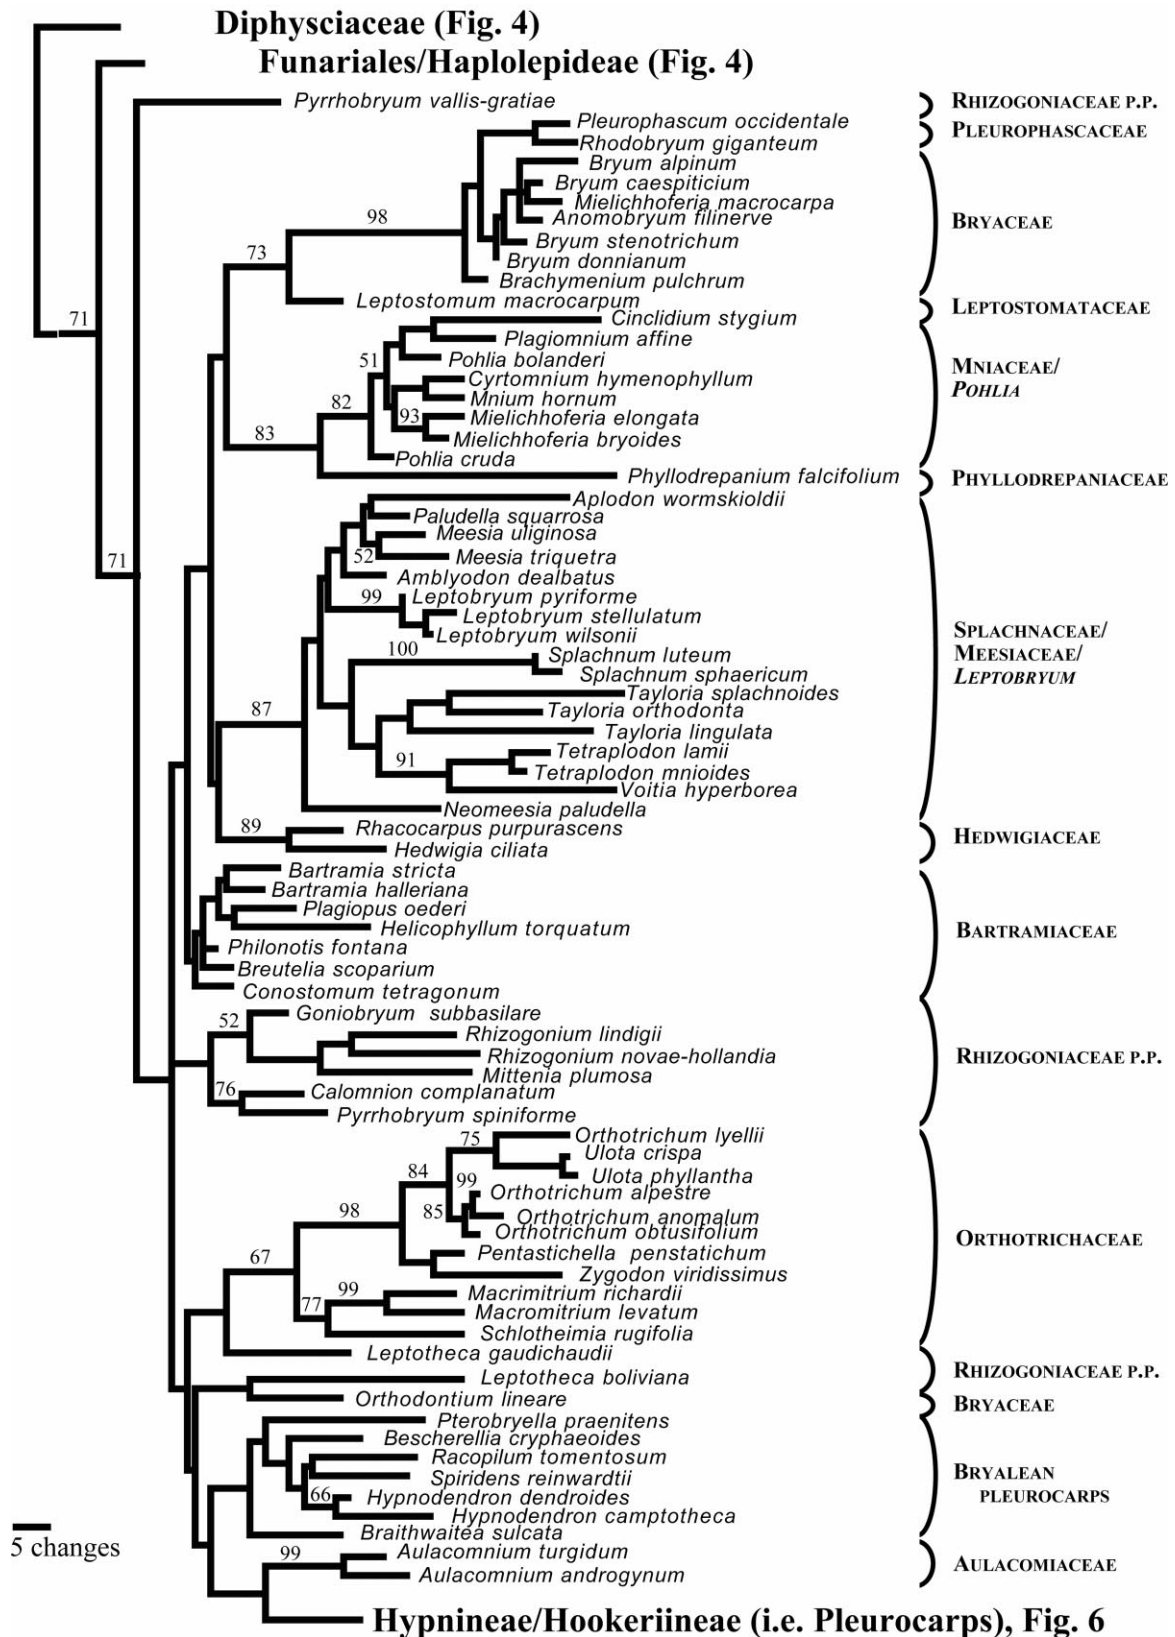

FIG. 5. Portion of the phylogram of the first most parsimonious tree (island one) inferred from the analysis of *rps4* gene complemented by its amino acid translation. Only relationships within the clade comprising mosses with opposite peristomes are shown here. Branch lengths are obtained following optimization by accelerated transformation of character-states.



downweigh the synonymous changes relative to the non-synonymous changes. Complementing the sequences by their amino acid translation as proposed by Agosti *et al.* (1996) allows for the non-synonymous changes to be given more weight by occurring twice in the data set, once as a nucleotide and once as an amino acid change. Clearly non-synonymous mutations, too, may occur in parallel and the inclusion of amino acid sequences in the data set would thus accentuate the effect of such homoplasious character-states on reconstructing the phylogeny. Examination of the consistency indices for different codon partitions for a tree based on the nucleotide data alone and one inferred from variation in both nucleotide and amino acid sequences reveals that the inclusion of amino acid sequences in the analysis resulted, as would be expected *a priori*, in a decrease of the average consistency index for characters in the third codon positions, and an increase in this index for the first and second character partitions. Consequently, the phylogenetic hypothesis inferred from the expanded data set draws more on the information carried by the characters expected *a priori* to be less variable, namely positions one and two, and may therefore be considered as a more accurate representation of the relationships within mosses given the data at hand.

#### Phylogenetic relationships

The phylogenetic hypothesis for deep divergences among major lineages of mosses (e.g. ordinal level *sensu* Vitt, 1984) as inferred here from analysing *rps4* sequences under maximum parsimony (Figs 2 and 3), agrees overall with the scenario proposed by Mishler and Churchill (1984) or Vitt (1984), except for the following relationships: (1) the Andreaeaceae and Andreaeobryaceae may not be sister taxa; (2) the Nematodontae (i.e. Tetrphidaceae and Polytrichaceae) compose a monophyletic lineage; and (3) the Buxbaumiineae *sensu* Vitt (1984) are polyphyletic, with the Diphysciaceae sister to the Arthrodontae and the Buxbaumiaceae with stronger affinities to either the Tetrphidaceae or the Polytrichaceae. Furthermore, the gymnostomous (or cleistocarpous) family Oedipodiaceae, traditionally considered allied to the Splachnaceae, is here shown to be of more ancestral origin—in some cases (Fig. 2B) even predating the dichotomy between nematodontous and arthrodontous mosses, a hypothesis that is congruent with that presented by Newton *et al.* (2000) based on molecular and morphological data.

The Andreaeidae *sensu* Vitt (1984) can be defined by features of spore development including a multiseriate protonema, parenchymatous protonemal appendages, the dehiscence of the sporangium along four or more longitudinal lines, calyptra formation, and the mode of pigmentation of the exothelial cells (Murray, 1988; Newton *et al.*, 2000). The phylogenetic signal emerging from the parsimony analysis of the nucleotide and amino acid data corroborates that of other molecular data sets (Newton *et al.*, 2000) in supporting the monophyly of the Andreaeidae. This subclass comprises two lineages: the Andreaeaceae and the Andreaeobryaceae, which differ by a suite of characters described in great detail by Murray (1988). Phylogenetic

analyses of morphological characters alone under maximum parsimony resulted in the polyphyly of the Andreaeidae (Newton *et al.*, 2000), with the Andreaeobryaceae and the Andreaeaceae sister to *Takakia*, and the peristomate mosses, respectively. For the four characters for which *Takakia* and *Andreaeobryum* share the same state and differ from *Andreaea*, one is synplesiomorphic among land plants (absence of axillary hairs), one is a potential synapomorphy with the Bryidae (long tapering shape of the foot), and two are potentially autapomorphic for the *Takakia-Andreaeobryum* clade (presence of mucilage hairs, lack of regular lines of dehiscence along sutures of thin-walled cells). Schuster (1997) raised some doubts on the homology of mucilage papillae between these taxa, and the irregular dehiscence in *Andreaeobryum* could be seen as a reversal, or a synplesiomorphy. The characterization of the foot of *Andreaea* as conical *vs.* long tapered has little bearing on the phylogenetic reconstruction since it is autapomorphic. Weighted against the autapomorphies of the Andreaeidae, there seems little morphological evidence left in support of polyphyly of the Andreaeidae.

The Bryidae *sensu* Vitt (1984), which comprise all peristomate mosses, is resolved as a natural group (Figs 2 and 3). This lineage is further characterized by imperforate water conducting cells, the presence of filamentous protonemata, terminal antheridia, and cylindrical columella in the sporangium (Newton *et al.*, 2000). Two basic peristomial architectures occur in these mosses. The nematodontous peristome, which is composed of a single row of teeth made of several layers of whole cells—rather than one or two rows of teeth built from cell wall remnants as in the arthrodontous type—characterizes the Polytrichales and the Tetrphidales. Mishler and Churchill (1984) considered the Nematodontae a paraphyletic assemblage on the basis of air spaces occurring in the Polytrichales and Bryales, but lacking in the Tetrphidales, Sphagnales and Andreaeales, as well as in *Takakia* (Renzaglia, pers. comm.). Analysis of multiple gene sequence data and morphological features corroborated the hypothesis of paraphyly, but suggested that the Tetrphidales and not the Polytrichales were sister to the Bryales (Newton *et al.*, 2000). Successively weighting transformations led Hyvönen *et al.* (1998) to a similar hypothesis. Bootstrap support for this topology did not, however, exceed 54 % in either study. Characters defining a relationship of the Tetrphidales to the Bryales are the ‘induction of brood bodies by abscisic acid’, and the ‘gametophyte transfer cells in placenta with labyrinthine walls on inner tangential walls’ (Newton *et al.*, 2000). Analyses of *rps4* data, particularly in combination with the amino acid sequences, yield the Nematodontae as a monophyletic lineage. Similarly, parsimony analyses of *18S rRNA* sequences resolved nematodonts as a natural lineage (Hedderson *et al.*, 1998). Further studies, focusing on the Nematodontae and modelling the rate of molecular evolution of the different loci, are needed to critically test these alternative phylogenetic hypotheses.

Based on *rps4*, the Tetrphidales may include *Oedipodium* and *Buxbaumia*. The association between *Tetraphis* and *Oedipodium* is resolved based on variation in nucleotide sequences only (Figs 2A and 3A). Inclusion of the amino

acid sequences in the analysis confines the Oedipodiaceae to a basal position within the Bryidae (Fig. 2B), a hypothesis congruent with that inferred from multiple gene sequences (Newton *et al.*, 2000). Vitt (1982, 1984) considered the Oedipodiaceae to be allied to the Splachnaceae. The only species of *Oedipodium* is gymnostomous (i.e. lacking a peristome), a feature widely homoplasious in mosses (Vitt, 1981) and thus not necessarily indicative of shared ancestry. Although the gametophytic and sporophytic characters may be reminiscent of the Splachnaceae (see Vitt, 1982), they are not incompatible with other families such as the Funariaceae and even the Tetrarhizaceae; or they may even indicate an early divergence within the Bryidae. Analysis of morphological data concurs with the general molecule-based hypothesis that *Oedipodium* is not a member of the Arthrodoxontae, but is instead related to the Nematodontae or its ancestor (Hyvönen *et al.*, 1998; Newton *et al.*, 2000; this study).

In all most parsimonious topologies (Figs 2 and 3), the Buxbaumiaceae, a family of species that have an extremely reduced gametophyte but with a massive sporophyte, are resolved with close affinities to the Nematodontae, in a position sister to either the Tetrarhizaceae (Figs 2A,B) or the Polytrichaceae (Fig. 3A,B). The Diphysciaceae, traditionally considered allied to the Buxbaumiaceae (Mishler and Churchill, 1984; Vitt, 1984) are instead consistently resolved sister to the Arthrodoxontae. Vitt (1984) had argued that the affinities of *Buxbaumia* were with the Arthrodoxontae, as the peristome comprises multiple rows of teeth of which the innermost are composed of cell plates. However, one could similarly attribute more weight to the presence of whole cells in the outer peristome teeth, a feature diagnostic of nematodontous peristomes. The position of *Buxbaumia* as inferred from molecular characters tends to suggest that the nematodontous elements in the peristome of *Buxbaumia* are homologous, if only by their architecture, to those found in the Tetrarhizales and Polytrichales.

The polyphyly of the Buxbaumiineae was also found by Hyvönen *et al.* (1998) and Newton *et al.* (2000) based on total evidence from multiple gene sequences. Noteworthy in this regard is the incongruence between most parsimonious topologies inferred from nuclear or chloroplast gene sequences. Analysis of 18S rDNA sequence data reveals the Buxbaumiineae as monophyletic, whereas *rbcL* data resolves them as a paraphyletic assemblage, with *Diphyscium* sister to *Funaria* and *Buxbaumia* with ambiguous affinities (Hyvönen *et al.*, 1998). Although the Buxbaumiineae are consistently resolved as a paraphyletic assemblage in our analyses, *Buxbaumia* shares with the Diphysciaceae and all Arthrodoxonts, a similar size amplicon, approx. 200 bp shorter than in the Polytrichales, Tetrarhizales, Andreaeidae and Sphagnidae. The difference in size is accounted for by an indel in the 3' intergenic spacer. The intergenic spacer in *Marchantia polymorpha* (GenBank accession X04465) is 228 bp and thus similar in size to that found in the Sphagnidae, Andreaeidae, Polytrichales and Tetrarhizales. The spacer is highly variable, making it impossible to assess homology among sequences and thus to assert the positional homology of the indel. The

comparison with *Marchantia* does, however, suggest that the spacer suffered a deletion prior to the evolution of the Arthrodoxontae. Based on the phylogeny recovered here and elsewhere (Newton *et al.*, 2000) the deletion observed in the Buxbaumiaceae and the arthrodoxonts, including the Diphysciaceae is thus probably homoplasious.

A sister relationship of the Diphysciaceae to the 'true' arthrodoxonts was also hypothesized by Beckert *et al.* (1999) and Newton *et al.* (2000) based on sequence variation in the mitochondrial locus *nad5* and combined molecular characters from the chloroplast and the nuclear genome respectively. Such phylogenetic association is, however, not supported by independent analysis of nuclear data. As discussed above, analysis of 18S rDNA data by Hyvönen *et al.* (1998) and Cox (1998) suggest that the Buxbaumiineae are monophyletic, whereas the inclusion of chloroplast data (Newton *et al.*, 2000) leads to a phylogenetic hypothesis congruent with the one obtained by *rps4* data. Parsimony analysis of 18S rDNA data resulted in the Buxbaumiineae nested within a monophyletic nematodontous clade (Cox 1998; see also Hedderson *et al.*, 1998 who only included *Diphyscium* as an exemplar). The present study is the only one wherein the family Diphysciaceae is represented by its three genera, namely *Diphyscium*, *Muscoclorella* and *Theriotia*. The latter two genera lack a peristome, whereas species of *Diphyscium* bear a well-developed peristome of an architectural type similar to that of the peristome in *Buxbaumia*. Edwards (1984) and Vitt (1984) considered the peristome of *Diphyscium* to be arthrodoxontous in origin. It differs from that of *Buxbaumia* by its rather reduced exostome, whose teeth are arranged into a single row and are composed of cell remnants only. Furthermore, Shaw *et al.* (1987) showed that development of the *Diphyscium* peristome conforms to the haplolepidous pattern. A position of *Diphyscium* sister to the Bryales, as suggested by chloroplast and mitochondrial data, is thus fully congruent with characters of the peristome. The incongruence between plastid and nuclear data could be an artifact of different sampling strategies, incorrect modelling of the data, or distinct evolutionary histories, and perhaps of hybridization events, and therefore warrants further study.

Within the Bryidae, mosses are primarily subdivided according to the architecture of their peristome. Given the exception previously addressed by Goffinet and Cox (2000), the families of the Funariaceae are monophyletic and, together with the Encalyptaceae, they compose a natural lineage in most if not all optimal topologies (Figs 2 and 3). They are further typically associated with the Timmiaceae and the Catascopeaceae. The sole species of the Catascopeaceae lacks an endostome. It has traditionally been aligned within the Bryineae (Vitt, 1984), on the basis of vegetative characters (Vitt, 1982). Following Vitt's (1984) concept of peristome types, the TEF-clade comprises three distinct architectures, namely the Funaria-, Encalypta-, and Bryum-type. As argued by Cox and Hedderson (1999), Goffinet and Cox (2000), and Cox *et al.* (2000), the peristome of *Timmia* is best regarded as opposite rather than alternate as in the Bryum-type. Consequently, the clade comprising the funariacean taxa, the Encalyptaceae, and the Timmiaceae

can be diagnosed by their diplolepidous peristome with opposite arrangement of endostome and exostome.

Although the haplolepidous peristome is typically composed of an endostome only, the position of these inner segments is the same as that of the segments in the Funaria-type peristome, and the arrangement of the haplolepidous peristomes is thus opposite (Vitt *et al.*, 1998). The Haplolepidae, excluding the Pleurophascaceae, compose a monophyletic lineage in most optimal topologies (Figs 2 and 3). The Drummondia-Scouleria clade and the Bryoxiphaceae are consistently resolved near the base of this large lineage of opposite peristomate mosses, but their affinities are ambiguous. *Bryoxiphium* is gymnostomous, whereas *Drummondia* and *Scouleria* have a peristome that, although reduced, fits the haplolepidous architectural type (Churchill, 1985; Shaw, 1986). The support for the monophyly of the Timmiaceae-Funariaceae-Encalyptaceae-Haplolepidae clade is low (<50% bootstrap value), but it is present in most or all of the most parsimonious topologies inferred from *rps4* data and their amino acid translations (Figs 2 and 3). Maximum parsimony analysis of mitochondrial data yielded relationships within the Bryales that overlap perfectly with the present topology, although, again, support from bootstrap replicates was lacking (Beckert *et al.*, 1999). This hypothesis is incongruent with the relationships inferred from data sets that are constructed from, or include, nuclear 18S rDNA gene sequences (e.g. Cox, 1998; Hedderson *et al.*, 1998; Goffinet and Cox, 2000). Optimal topologies inferred from these data suggest a closer relationship between the Encalyptales, haplolepidae, and remaining diplolepidous taxa, to the exclusion of *Diphyscium*, the Funariales and Timmiaceae, although bootstrap support is lacking for the relevant node. However, analyses of combined data from the 18S rDNA and chloroplast genome (including the *rps4* gene) by Newton *et al.* (2000) and Cox *et al.* (2000) suggest the same relationships and provide moderate bootstrap support at the relevant node (75% and 67%, respectively).

The remaining diplolepidae, i.e. those with an alternate arrangement of their peristomes, are consistently resolved as a monophyletic group, with low to moderate bootstrap values (Figs 2 and 3). This lineage includes the Orthotrichineae, the Bryineae, and the combined Hypniineae-Leucodontineae clade. Included here are also the Splachniaceae, whose peristome development is consistent with this phylogenetic placement even though *Splachnum*, the only member with a double peristome, has endostome segments that are opposite and fused to the exostome teeth (see Goffinet *et al.*, 1999 for further discussion). The monophyly of the Meesiaceae/Splachnaceae/*Leptobryum* clade, and the *Pohlia s. l.*/Mniaceae clade, is well supported here, and is corroborated by previous analyses of combined nuclear 18S rDNA and chloroplast data, plus separate analyses of the two genomic partitions (Cox, 1998; Cox and Hedderson, 1999; Cox *et al.*, 2000). Similarly, the polyphyly of the Rhizogoniaceae is congruent with results from previous studies (Cox and Hedderson, 1999). The traditional pleurocarpous mosses form a monophyletic clade in all most parsimonious reconstructions. Although the strict consensus of all most parsimonious trees suffers from low

resolution within this clade, the majority-rule consensus tree resolves the Hookeriineae as monophyletic and sister to the clade composed of the Hypniineae and the Leucodontineae. The latter two suborders are each polyphyletic (Fig. 6) as previously suggested by Buck *et al.* (2000) and De Luna *et al.* (2000).

The major clades resolved by analysing *rps4* sequence data and their protein translation typically agree with taxa as defined by Vitt (1984) on the basis of peristome characters. However, the phylogenetic significance of these characters remains ambiguous, as already suggested by Vitt *et al.* (1998). The classification of mosses is based on features of the peristome and, within the Arthrodontae, peristome types are defined based on combinations of states pertaining to four characters: peristome opposite or alternate, the presence of cilia between adjacent endostomial segments, and finally, the pattern of cell division with the inner peristomial layer (IPL). Ancestral character-state reconstruction relies heavily on polarization using outgroup comparison; however, all basal lineages of mosses (i.e. Takakiaceae, Sphagnaceae, Andreaeaceae, Andreaebryaceae) lack a peristome. Furthermore, the problem is exacerbated by the fact that alternative states of some characters define sister lineages, making reconstruction of ancestral states ambiguous or impossible. Considering, for example, the dichotomy between the Nematodontae and the Arthrodontae (Fig. 2B), how do we decide which architecture is plesiomorphic? Finally, the lack of ontogenetic data for critical taxa such as the Timmiaceae, and ambiguous phylogenetic relationships of others (such as the Orthotrichaceae), preclude any objective reconstruction of the evolution of peristome-types [see Goffinet and Cox (2000) and Cox *et al.* (2000) for further discussion].

#### Single gene phylogeny and bryophyte systematics

The reconstruction of the phylogeny of mosses is, despite the tremendous progress achieved within the last 5 years, still in its infancy. Although little consensus has been reached regarding the relationships among major lineages of mosses, molecular data are contributing greatly by offering new suites of characters to test systematic concepts, and for assessing the affinities of taxa with reduced morphologies (e.g. Goffinet *et al.*, 1998; Hedderson *et al.*, 1999; Buck *et al.*, 2000; Goffinet and Cox, 2000). These studies highlight the difficulty of circumscribing suprageneric taxa based on morphology, revealing in particular the polyphyletic (and not just paraphyletic) nature of several families or suborders, such as the Funariaceae and Funariineae (Goffinet and Cox, 2000), the Bryaceae and Bryineae (Cox and Hedderson, 1999), the Orthotrichaceae and Orthotrichineae (Goffinet *et al.*, 1998), and the Hypniaceae (Buck *et al.*, 2000). These cases of polyphyly all involve taxa that appear, from molecular evidence, to be only distantly related. In the present study, additional cases are hypothesized where taxa circumscribed *sensu* Vitt (1984) are polyphyletic: the Bryineae due to a nested position of the Schistostegaceae within the Dicranineae; the Dicranineae based on the Pleurophascaceae, which are consistently resolved sister to a clade of bryaceae taxa; and the



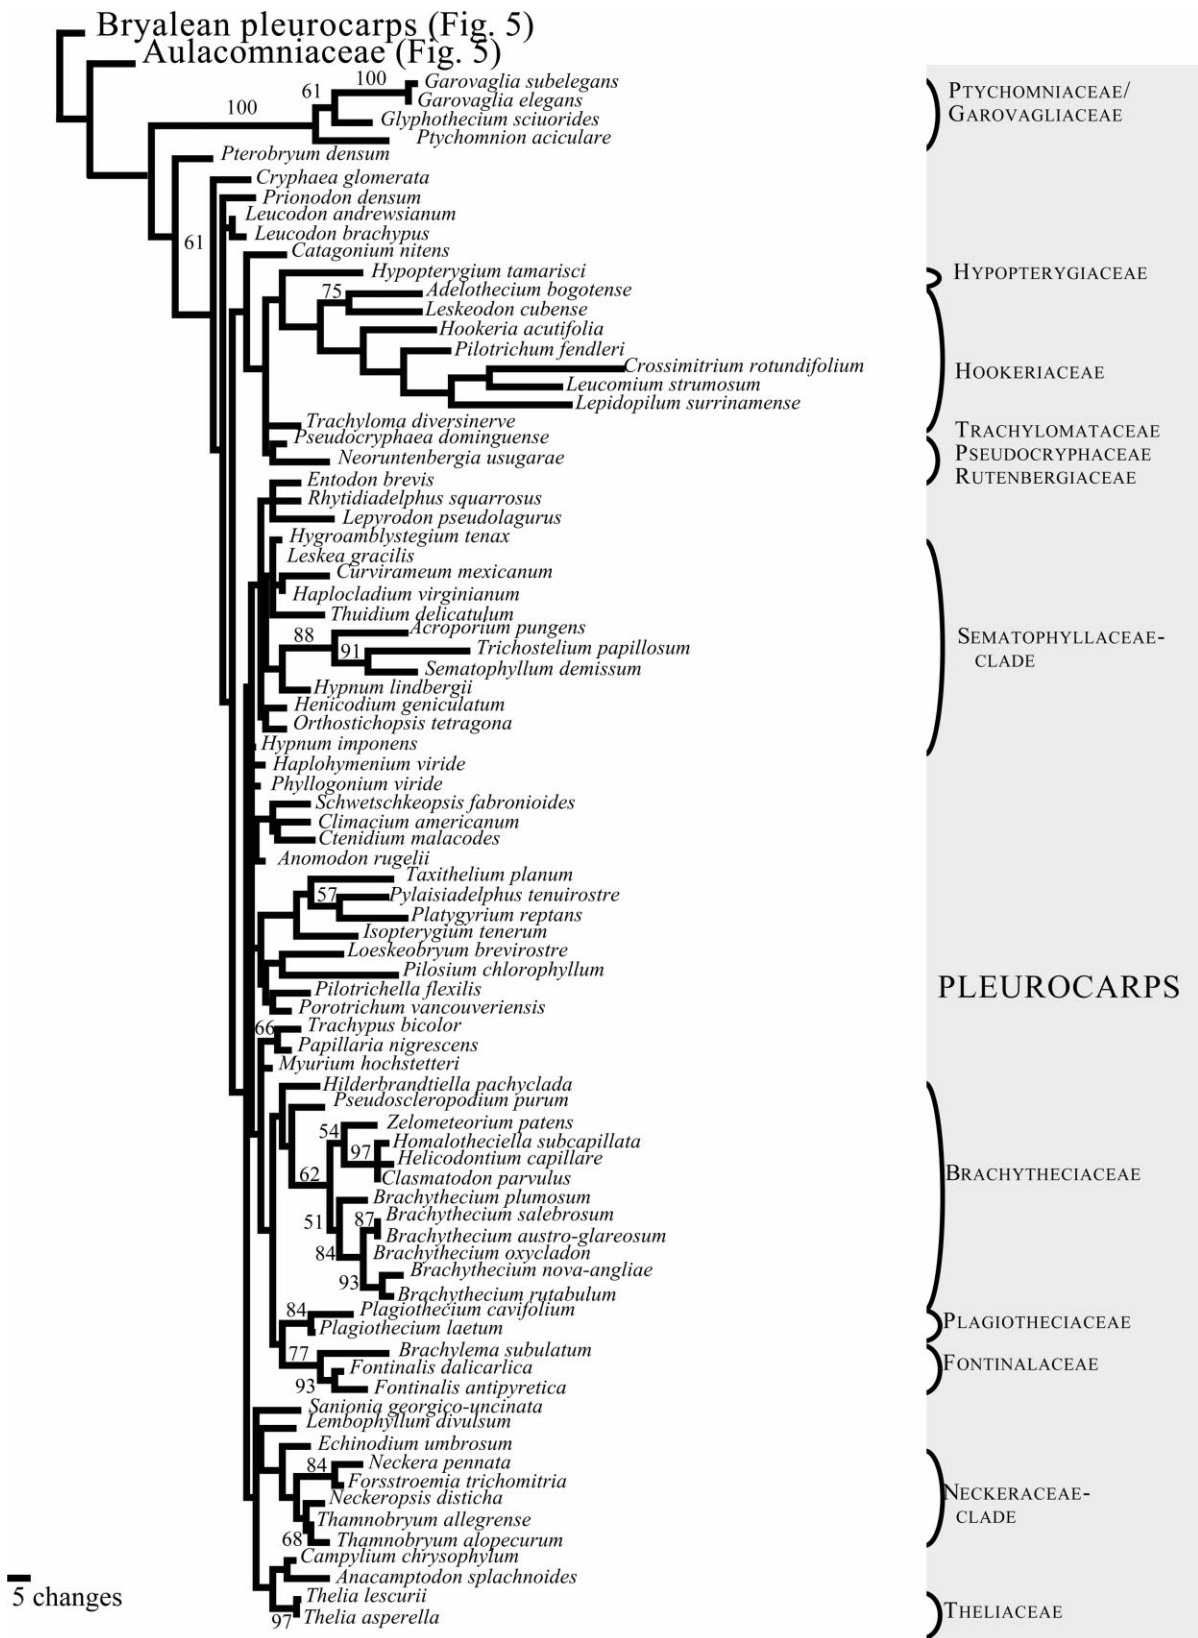

FIG. 6. Portion of the phylogram of the first most parsimonious tree (island one) inferred from the analysis of *rps4* gene complemented by its amino acid translation. Only relationships within the clade comprising mosses with alternate peristomes are shown here. Branch lengths are obtained following optimization by accelerated transformation of character-states.



Tetraphidales, due to the position of the Calomniaceae within the Rhizogoniaceae. The latter family is also shown to include the Mitteniaceae, which had been recognized at the ordinal level based on unique peristomial architecture by Shaw (1985). Furthermore, molecular data suggest that the affinities of the Catascopiaceae lie with taxa defined by opposite peristomes rather than within the Bryineae (see Vitt, 1984).

Phylogenetic hypotheses inferred from a single gene should be viewed with caution, as the gene phylogeny may not overlap with the organismal phylogeny (Doyle, 1992). Some of the relationships obtained by analysing the *rps4* gene are, however, corroborated by nuclear data (e.g. Ephemeraceae: Goffinet and Cox, 2000). An assumption of monophyly of an ingroup is essential for any phylogenetic study aimed at reconstructing the evolutionary histories of taxa and the transformations of the characters that define them. Although multiple outgroups are typically used in such studies, if the polyphyly of the ingroup involves a distantly related taxon then polyphyly may go unnoticed. With approx. 300 sequences currently available and with another 100 or more soon to be published, *rps4* is the most extensively sequenced gene in mosses, spanning the widest systematic range. Although the *rps4*-based phylogeny shows little support in many of its branches, the core of most families is resolved as monophyletic and hence *rps4* sequence data offer a suitable framework for a preliminary assessment of the monophyly of supraspecific moss taxa.

#### ACKNOWLEDGEMENTS

This study was made possible by financial support from Duke University to A.J. Shaw and B. Goffinet, by NSF-grant DEB-9806955 to A.J. Shaw and B. Goffinet, financial support to C.J. Cox from The University of Reading, and a NERC (U.K.) Advanced Research Fellowship to T.A.J. Hedderson. We thank Catherine La Farge and William R. Buck for the sequences of *Leucoloma* sp. nov. and *Pterobryella praenitens*, respectively, Heinar Streimann (CBG) for sending fresh material of *Mittenia plumosa*, Angela Newton (BM) for material of *Helicophyllum torquatum* and the curators of BUF, EGR, H, MO, and NY for permission to sample collections for DNA extraction. Finally, we are thankful for the comments made by an anonymous reviewer.

#### LITERATURE CITED

- Agosti D, Jacobs D, DeSalle R. 1996. On combining protein sequences and nucleic acid sequences in phylogenetic analysis: The homeobox protein case. *Cladistics* 12: 65–82.
- Beckert S, Steinhauser S, Muhle H, Knoop V. 1999. A molecular phylogeny of the bryophytes based on nucleotide sequences of the mitochondrial *nad5* gene. *Plant Systematics and Evolution* 218: 179–192.
- Buck WR, Goffinet B. 2000. Morphology and classification of mosses. In: Shaw AJ, Goffinet B, eds. *Bryophyte biology*. Cambridge: Cambridge University Press.
- Buck WR, Goffinet B, Shaw AJ. 2000. Testing morphological concepts of orders of pleurocarpous mosses (Bryophyta) using phylogenetic reconstructions based on *trnL-trnF* and *rps4* sequences. *Molecular Phylogenetics and Evolution* 16: 180–198.
- Capesius I, Stech M. 1997. Molecular relationships within the mosses based on 18S rRNA gene sequences. *Nova Hedwigia* 64: 525–533.
- Churchill SP. 1985. The systematics and biogeography of *Scouleria* Hook. (Musci: Scouleriaceae). *Lindbergia* 11: 59–71.
- Cox CJ. 1998. Phylogenetic relationships of the Eubryalean mosses (Bryineae, Musci). PhD Thesis, The University of Reading, Reading, UK.
- Cox CJ, Hedderson TA. 1999. Phylogenetic relationships among the ciliate arthroodontous mosses: evidence from chloroplast and nuclear DNA sequences. *Plant Systematics and Evolution* 215: 119–139.
- Cox CJ, Goffinet B, Newton AE, Shaw AJ, Hedderson TAJ. 2000. Phylogenetic relationships among the diplolepidous-alternate mosses (Bryidae) inferred from nuclear and chloroplast DNA sequences. *The Bryologist* 103: 224–241.
- Crosby MR, Magill RE, Allen B, He S. 1999. A checklist of the mosses. St. Louis: Missouri Botanical Garden.
- De Luna E, Newton AE, Withey A, González D, Mishler BD. 1999. The transition to pleurocarpy: A phylogenetic analysis of the main Diplolepidous lineages based on *rbcL* sequences and morphology. *The Bryologist* 102: 634–650.
- De Luna E, Buck WR, Akyama H, Arikawa T, Tsubota H, González D, Newton AE, Shaw AJ. 2000. Phylogenetic patterns within the Hypnobryalean pleurocarpous mosses inferred from cladistic analyses of three sequence data sets: *trnL-F*, *rps4* and *rbcL*. *The Bryologist* 103: 242–256.
- Doyle JJ. 1992. Gene trees and species trees: molecular systematics as one-character taxonomy. *Systematic Botany* 17: 144–163.
- Edwards SR. 1984. Homologies and inter-relations of moss peristomes. In: Schuster RM, ed. *New manual of bryology*, vol. 2. Nichinan: Hattori Botanical Garden.
- Goffinet B, Cox CJ. 2000. Phylogenetic relationships among basal-most arthroodontous mosses with special emphasis on the evolutionary significance of the Funariineae. *The Bryologist* 103: 212–223.
- Goffinet B, Bayer RJ, Vitt DH. 1998. Circumscription and phylogeny of the Orthotrichales (Bryopsida) inferred from *rbcL* sequence analysis. *American Journal of Botany* 85: 1324–1337.
- Goffinet B, Shaw AJ, Anderson LE, Mishler BD. 1999. Peristome development in mosses in relation to systematics and evolution. V. Diplolepidaeae: Orthotrichaceae. *The Bryologist* 102: 581–594.
- Hedderson TA, Chapman R, Cox CJ. 1998. Bryophytes and the origins and diversification of land plants: new evidence from molecules. In: Bates JW, Ashton NW, Duckett JG, eds. *Bryology for the twenty-first century*. Leeds: Maney Publishing and British Bryological Society.
- Hedderson TA, Chapman RL, Rootes WL. 1996. Phylogenetic relationships of bryophytes inferred from nuclear-encoded rRNA gene sequences. *Plant Systematics and Evolution* 200: 213–224.
- Hedderson TA, Cox CJ, Gibbins JG. 1999. Phylogenetic relationships of the Wardiaceae (Musci): evidence from *18s rRNA* and *rps4* gene sequences. *The Bryologist* 102: 26–31.
- Hillis DM, Huelsenbeck JP. 1992. Signal, noise, and reliability in molecular phylogenetic analyses. *Journal of Heredity* 83: 189–195.
- Hyvönen J, Hedderson TA, Smith Merrill GL, Gibbins JG, Koskinen S. 1998. On phylogeny of the Polytrichales. *The Bryologist* 101: 489–504.
- La Farge C, Mishler BD, Wheeler J, Wall DP, Johannes K, Schaffer S, Shaw AJ. 2000. Phylogenetic relationships within the Haplolepidous mosses. *The Bryologist* 103: 257–276.
- Lewis L, Mishler BD, Vilgalys R. 1997. Phylogenetic relationships of the liverworts (Hepaticae), a basal embryophyte lineage, inferred from nucleotide sequence data of the chloroplast gene *rbcL*. *Molecular Phylogenetics and Evolution* 7: 377–393.
- Maddison WP, Maddison DR. 1999. *MacClade v. 3.08. Analysis of phylogeny and character evolution*. Sunderland: Sinauer.
- Mishler BD, Churchill SP. 1984. A cladistic approach to the phylogeny of the 'Bryophytes'. *Brittonia* 36: 406–424.
- Murray BM. 1988. Systematics of the Andreaeopsida (Bryophyta): Two orders with links to *Takakia*. *Nova Hedwigia* 90: 289–336.

- Newton AE, Cox CJ, Duckett JG, Wheeler J, Goffinet B, Hedderson TAJ, Mishler BD. 2000. Evolution of the major moss lineages. *The Bryologist* 103: 187–211.
- Olmstead RG, Reeves PA, Yen AC. 1998. Patterns of sequence evolution and implications for parsimony analysis of chloroplast DNA. In: Soltis DE, Soltis PS, Doyle JJ, eds. *Molecular systematics of plants II. DNA sequencing*. Boston: Kluwer.
- Renzaglia KS, McFarland KD, Smith DK. 1997. Anatomy and ultrastructure of the sporophyte of *Takakia ceratophylla* (Bryophyta). *American Journal of Botany* 84: 1337–1350.
- Sanderson MJ, Donogue MJ. 1989. Patterns of variation in levels of homoplasy. *Evolution* 43: 1781–1795.
- Schuster RM. 1997. On *Takakia* and the phylogenetic relationships of the Takakiales. *Nova Hedwigia* 64: 281–310.
- Shaw AJ. 1985. Peristome structure in the Mitteniales (ord. Nov.: Musci), a neglected novelty. *Systematic Botany* 10: 224–233.
- Shaw AJ. 1986. Peristome structure in the Orthotrichaceae. *Journal of the Hattori Botanical Laboratory* 60: 119–136.
- Shaw AJ. 2000. Phylogeny of the Sphagnopsida based on nuclear and chloroplast DNA sequences. *The Bryologist* 103: 277–306.
- Shaw AJ, Anderson LE. 1988. Peristome development in mosses in relation to systematics and evolution. II. *Tetraphis pellucida* (Tetraphidaceae). *American Journal of Botany* 75: 1019–1032.
- Shaw AJ, Anderson LE, Mishler BD. 1987. Peristome development in mosses in relation to systematics and evolution. I. *Diphyscium foliosum* (Buxbaumiaceae). *Memoirs of the New York Botanical Garden* 45: 55–70.
- Shaw AJ, Mishler BD, Anderson LE. 1989a. Peristome development in mosses in relation to systematics and evolution. III. *Funaria hygrometrica*, *Bryum pseudocapillare*, and *B. bicolor*. *Systematic Botany* 14: 24–36.
- Shaw AJ, Mishler BD, Anderson LE. 1989b. Peristome development in mosses in relation to systematics and evolution. IV. Haplolepidaceae: Ditrichaceae and Dicranaceae. *The Bryologist* 92: 314–325.
- Smith DK, Davison PG. 1993. Antheridia and sporophytes in *Takakia ceratophylla* (Mitt.) Grolle: evidence for reclassification among the mosses. *Journal of the Hattori Botanical Laboratory* 73: 263–271.
- Stech M. 1999. A molecular systematic contribution to the position of *Amphidium* Schimp. (Rhabdoweisiaceae, Bryopsida). *Nova Hedwigia* 68: 291–300.
- Swofford DL. 2000. *PAUP\*4.0b3a: phylogenetic analysis using parsimony (and other methods), version 4.0*. Sunderland: Sinauer Associates.
- Templeton AR. 1983. Phylogenetic inference from restriction endonuclease cleavage site maps with particular reference to the humans and apes. *Evolution* 37: 221–244.
- Vitt DH. 1981. Adaptive modes of the moss sporophyte. *The Bryologist* 84: 166–186.
- Vitt DH. 1982. Sphagnopsida and Bryopsida. In: Parker SP, ed. *Synopsis and classification of living organisms, vol 1*. New York: McGraw-Hill.
- Vitt DH. 1984. Classification of the Bryopsida. In: Schuster RM, ed. *New manual of bryology, vol 2*. Nichinan: Hattori Botanical Laboratory.
- Vitt DH, Goffinet B, Hedderson TAJ. 1998. The ordinal classification of the mosses: Questions and answers for the 1990s. In: Bates JW, Ashton NW, Duckett JG, eds. *Bryology for the twenty-first century*. Leeds: Maney Publishing and British Bryological Society.
- Waters DA, Buchheim MA, Dewey RA, Chapman RC. 1992. Preliminary inferences of the phylogeny of bryophytes from nuclear-encoded ribosomal RNA sequences. *American Journal of Botany* 79: 459–466.
